# Supplementary material for: Non-relativistic torque and Edelstein effect in non-collinear magnets
Source: PubMed Central journal article supplement (PMC11372084; doi:10.1038/s41467-024-51565-6), 2024-09-03
Supplement: 41467_2024_51565_MOESM1_ESM.pdf [file 41467_2024_51565_MOESM1_ESM.pdf]

## Supplementary Material: Non-relativistic torque and Edelstein effect in non-collinear magnets

Rafael González-Hernández<sup>1</sup>, Philip Ritzinger<sup>2</sup>, Karel Výborný<sup>2</sup>, Jakub Železný<sup>2</sup>, Aurélien Manchon<sup>3</sup>

<sup>1</sup>*Grupó de Investigación en Física Aplicada, Departamento de Física, Universidad del Norte, Barranquilla, Colombia;* <sup>2</sup>*Institute of Physics, Czech Academy of Sciences, Cukrovarnická 10, 162 00 Praha 6 Czech Republic;* <sup>3</sup>*Aix-Marseille Univ, CNRS, CINaM, Marseille, France*

## SYMMETRY TENSORS

Here we give the general symmetry-restricted form of the Edelstein effect response tensor  $\chi$  for the systems discussed in the text. In Table I we give the symmetry tensors for  $\text{Mn}_3\text{Sn}$ . In Table II we give the symmetry tensors for the  $\text{Mn}_3\text{Ir}$  [111] bilayer. The symmetry of every Mn layer is the same. We note that we have constructed the bilayer in such a way that there are in fact six Mn sublattices in each layer. However, three of those are connected to the other three by translation and are thus equivalent. In Tables III and IV we give the  $\mathcal{T}$ -even resp.  $\mathcal{T}$ -odd symmetry tensors for  $\text{LuFeO}_3$ .

|                               | A                                                                                                                                                                  | B                                                                                                                                                                                                                                                                                                       | C                                                                                                                                                                                                                                                                                                       |
|-------------------------------|--------------------------------------------------------------------------------------------------------------------------------------------------------------------|---------------------------------------------------------------------------------------------------------------------------------------------------------------------------------------------------------------------------------------------------------------------------------------------------------|---------------------------------------------------------------------------------------------------------------------------------------------------------------------------------------------------------------------------------------------------------------------------------------------------------|
| $\mathcal{T}$ -even<br>no soc | $\begin{pmatrix} 0 & 0 & 0 \\ 0 & 0 & 0 \\ \sigma_{zx}^A & -\sqrt{3}\sigma_{zx}^A & 0 \end{pmatrix}$                                                               | $\begin{pmatrix} 0 & 0 & 0 \\ 0 & 0 & 0 \\ \sigma_{zx}^A & \sqrt{3}\sigma_{zx}^A & 0 \end{pmatrix}$                                                                                                                                                                                                     | $\begin{pmatrix} 0 & 0 & 0 \\ 0 & 0 & 0 \\ \sigma_{zx}^A & \sqrt{3}\sigma_{zx}^A & 0 \end{pmatrix}$                                                                                                                                                                                                     |
| $\mathcal{T}$ -even<br>soc    | $\begin{pmatrix} 0 & 0 & \sigma_{xz}^A \\ 0 & 0 & -\sqrt{3}\sigma_{xz}^A \\ \sigma_{zx}^A & -\sqrt{3}\sigma_{zx}^A & 0 \end{pmatrix}$                              | $\begin{pmatrix} 0 & 0 & \sigma_{xz}^B \\ 0 & 0 & \sigma_{yz}^B \\ \sigma_{zx}^B & \sigma_{zy}^B & 0 \end{pmatrix}$                                                                                                                                                                                     | $\begin{pmatrix} 0 & 0 & \sigma_{xz}^C \\ 0 & 0 & \sigma_{yz}^C \\ \sigma_{zx}^C & \sigma_{zy}^C & 0 \end{pmatrix}$                                                                                                                                                                                     |
| $\mathcal{T}$ -odd<br>no soc  | $\begin{pmatrix} \sigma_{xx}^A & \sigma_{yx}^A & 0 \\ \sigma_{yx}^A & \sigma_{xx}^A - \frac{2\sqrt{3}\sigma_{yx}^A}{3} & 0 \\ 0 & 0 & 0 \end{pmatrix}$             | $\begin{pmatrix} -\frac{\sigma_{xx}^A}{2} + \frac{\sqrt{3}\sigma_{yx}^A}{2} & -\frac{\sqrt{3}\sigma_{xx}^A}{2} + \frac{3\sigma_{yx}^A}{2} & 0 \\ \frac{\sqrt{3}\sigma_{xx}^A}{2} + \frac{\sigma_{yx}^A}{2} & -\frac{\sigma_{xx}^A}{2} - \frac{\sqrt{3}\sigma_{yx}^A}{6} & 0 \\ 0 & 0 & 0 \end{pmatrix}$ | $\begin{pmatrix} -\frac{\sigma_{xx}^A}{2} + \frac{\sqrt{3}\sigma_{yx}^A}{2} & -\frac{\sqrt{3}\sigma_{xx}^A}{2} + \frac{3\sigma_{yx}^A}{2} & 0 \\ \frac{\sqrt{3}\sigma_{xx}^A}{2} + \frac{\sigma_{yx}^A}{2} & -\frac{\sigma_{xx}^A}{2} - \frac{\sqrt{3}\sigma_{yx}^A}{6} & 0 \\ 0 & 0 & 0 \end{pmatrix}$ |
| $\mathcal{T}$ -odd<br>soc     | $\begin{pmatrix} \sigma_{xx}^A & \sigma_{yx}^A & 0 \\ \sigma_{yx}^A & \sigma_{xx}^A - \frac{2\sqrt{3}\sigma_{yx}^A}{3} & 0 \\ 0 & 0 & \sigma_{zz}^A \end{pmatrix}$ | $\begin{pmatrix} \sigma_{xx}^B & \sigma_{xy}^B & 0 \\ \sigma_{yx}^B & \sigma_{yy}^B & 0 \\ 0 & 0 & \sigma_{zz}^B \end{pmatrix}$                                                                                                                                                                         | $\begin{pmatrix} \sigma_{xx}^C & \sigma_{xy}^C & 0 \\ \sigma_{yx}^C & \sigma_{yy}^C & 0 \\ 0 & 0 & \sigma_{zz}^C \end{pmatrix}$                                                                                                                                                                         |

TABLE I. The symmetry tensors for  $\text{Mn}_3\text{Sn}$ .  $A, B, C$  are the different sublattices as denoted in Fig. 2 of the main text.

|                               | A                                                                                                                                                                                                                                                      | B                                                                                                                                                                                                                                                          | C                                                                                                                               |
|-------------------------------|--------------------------------------------------------------------------------------------------------------------------------------------------------------------------------------------------------------------------------------------------------|------------------------------------------------------------------------------------------------------------------------------------------------------------------------------------------------------------------------------------------------------------|---------------------------------------------------------------------------------------------------------------------------------|
| $\mathcal{T}$ -even<br>no soc | $\begin{pmatrix} 0 & 0 & 0 \\ 0 & 0 & 0 \\ \sigma_{zx}^A & \sigma_{zy}^A & \sigma_{zz}^A \end{pmatrix}$                                                                                                                                                | $\begin{pmatrix} 0 & 0 & 0 \\ 0 & 0 & 0 \\ \sigma_{zx}^A & -\sigma_{zy}^A & -\sigma_{zz}^A \end{pmatrix}$                                                                                                                                                  | $\begin{pmatrix} 0 & 0 & 0 \\ 0 & 0 & 0 \\ \sigma_{zx}^C & 0 & 0 \end{pmatrix}$                                                 |
| $\mathcal{T}$ -even<br>soc    | $\begin{pmatrix} \sigma_{xx}^A & -\frac{2\sqrt{3}\sigma_{xx}^A}{3} - \sigma_{yx}^A & \sigma_{xz}^A \\ \sigma_{yx}^A & -\sigma_{xx}^A & -\sqrt{3}\sigma_{xz}^A \\ \sigma_{zx}^A & -\sqrt{3}\sigma_{zx}^A & 0 \end{pmatrix}$                             | $\begin{pmatrix} -\sigma_{xx}^A & -\frac{2\sqrt{3}\sigma_{xx}^A}{3} - \sigma_{yx}^A & \sigma_{xz}^A \\ \sigma_{yx}^A & \sigma_{xx}^A & \sqrt{3}\sigma_{xz}^A \\ \sigma_{zx}^A & \sqrt{3}\sigma_{zx}^A & 0 \end{pmatrix}$                                   | $\begin{pmatrix} 0 & \sigma_{xy}^C & \sigma_{xz}^C \\ \sigma_{yx}^C & 0 & 0 \\ \sigma_{zx}^C & 0 & 0 \end{pmatrix}$             |
| $\mathcal{T}$ -odd<br>no soc  | $\begin{pmatrix} \sigma_{xx}^A & \sigma_{xy}^A & \sigma_{xz}^A \\ \sigma_{yx}^A & \sigma_{yy}^A & \sigma_{yz}^A \\ 0 & 0 & 0 \end{pmatrix}$                                                                                                            | $\begin{pmatrix} \sigma_{xx}^A & -\sigma_{xy}^A & -\sigma_{xz}^A \\ -\sigma_{yx}^A & \sigma_{yy}^A & \sigma_{yz}^A \\ 0 & 0 & 0 \end{pmatrix}$                                                                                                             | $\begin{pmatrix} \sigma_{xx}^C & 0 & 0 \\ 0 & \sigma_{yy}^C & \sigma_{yz}^C \\ 0 & 0 & 0 \end{pmatrix}$                         |
| $\mathcal{T}$ -odd<br>soc     | $\begin{pmatrix} \sigma_{xx}^A & \sigma_{yx}^A & \sigma_{xz}^A \\ \sigma_{yx}^A & \sigma_{xx}^A - \frac{2\sqrt{3}\sigma_{yx}^A}{3} & \frac{\sqrt{3}\sigma_{xz}^A}{3} \\ \sigma_{zx}^A & \frac{\sqrt{3}\sigma_{zx}^A}{3} & \sigma_{zz}^A \end{pmatrix}$ | $\begin{pmatrix} \sigma_{xx}^A & -\sigma_{yx}^A & -\sigma_{xz}^A \\ -\sigma_{yx}^A & \sigma_{xx}^A - \frac{2\sqrt{3}\sigma_{yx}^A}{3} & \frac{\sqrt{3}\sigma_{xz}^A}{3} \\ -\sigma_{zx}^A & \frac{\sqrt{3}\sigma_{zx}^A}{3} & \sigma_{zz}^A \end{pmatrix}$ | $\begin{pmatrix} \sigma_{xx}^C & 0 & 0 \\ 0 & \sigma_{yy}^C & \sigma_{yz}^C \\ 0 & \sigma_{zy}^C & \sigma_{zz}^C \end{pmatrix}$ |

TABLE II. Symmetry tensors for the  $\text{Mn}_3\text{Ir}$  bilayer.

| sublattice | no SOC                                                                                                                    | SOC                                                                                                                                                                                                                                                                                                                                                                                                                 |
|------------|---------------------------------------------------------------------------------------------------------------------------|---------------------------------------------------------------------------------------------------------------------------------------------------------------------------------------------------------------------------------------------------------------------------------------------------------------------------------------------------------------------------------------------------------------------|
| A          | $\begin{pmatrix} 0 & 0 & 0 \\ 0 & 0 & 0 \\ 0 & \sigma_{zy}^A & 0 \end{pmatrix}$                                           | $\begin{pmatrix} 0 & \sigma_{xy}^A & 0 \\ \sigma_{yx}^A & 0 & \sigma_{yz}^A \\ 0 & \sigma_{zy}^A & 0 \end{pmatrix}$                                                                                                                                                                                                                                                                                                 |
| B          | $\begin{pmatrix} 0 & 0 & 0 \\ 0 & 0 & 0 \\ -\frac{\sqrt{3}\sigma_{zy}^A}{2} & -\frac{\sigma_{zy}^A}{2} & 0 \end{pmatrix}$ | $\begin{pmatrix} \frac{\sqrt{3}\sigma_{xy}^A}{4} + \frac{\sqrt{3}\sigma_{yx}^A}{4} & \frac{\sigma_{xy}^A}{4} - \frac{3\sigma_{yx}^A}{4} & -\frac{\sqrt{3}\sigma_{yz}^A}{2} \\ -\frac{3\sigma_{xy}^A}{4} + \frac{\sigma_{yx}^A}{4} & -\frac{\sqrt{3}\sigma_{xy}^A}{4} - \frac{\sqrt{3}\sigma_{yx}^A}{4} & -\frac{\sigma_{yz}^A}{2} \\ -\frac{\sqrt{3}\sigma_{zy}^A}{2} & -\frac{\sigma_{zy}^A}{2} & 0 \end{pmatrix}$ |
| C          | $\begin{pmatrix} 0 & 0 & 0 \\ 0 & 0 & 0 \\ \frac{\sqrt{3}\sigma_{zy}^A}{2} & -\frac{\sigma_{zy}^A}{2} & 0 \end{pmatrix}$  | $\begin{pmatrix} -\frac{\sqrt{3}\sigma_{xy}^A}{4} - \frac{\sqrt{3}\sigma_{yx}^A}{4} & \frac{\sigma_{xy}^A}{4} - \frac{3\sigma_{yx}^A}{4} & \frac{\sqrt{3}\sigma_{yz}^A}{2} \\ -\frac{3\sigma_{xy}^A}{4} + \frac{\sigma_{yx}^A}{4} & \frac{\sqrt{3}\sigma_{xy}^A}{4} + \frac{\sqrt{3}\sigma_{yx}^A}{4} & -\frac{\sigma_{yz}^A}{2} \\ \frac{\sqrt{3}\sigma_{zy}^A}{2} & -\frac{\sigma_{zy}^A}{2} & 0 \end{pmatrix}$   |
| D          | $\begin{pmatrix} 0 & 0 & 0 \\ 0 & 0 & 0 \\ 0 & -\sigma_{zy}^A & 0 \end{pmatrix}$                                          | $\begin{pmatrix} 0 & \sigma_{xy}^A & 0 \\ \sigma_{yx}^A & 0 & -\sigma_{yz}^A \\ 0 & -\sigma_{zy}^A & 0 \end{pmatrix}$                                                                                                                                                                                                                                                                                               |
| E          | $\begin{pmatrix} 0 & 0 & 0 \\ 0 & 0 & 0 \\ \frac{\sqrt{3}\sigma_{zy}^A}{2} & \frac{\sigma_{zy}^A}{2} & 0 \end{pmatrix}$   | $\begin{pmatrix} \frac{\sqrt{3}\sigma_{xy}^A}{4} + \frac{\sqrt{3}\sigma_{yx}^A}{4} & \frac{\sigma_{xy}^A}{4} - \frac{3\sigma_{yx}^A}{4} & \frac{\sqrt{3}\sigma_{yz}^A}{2} \\ -\frac{3\sigma_{xy}^A}{4} + \frac{\sigma_{yx}^A}{4} & -\frac{\sqrt{3}\sigma_{xy}^A}{4} - \frac{\sqrt{3}\sigma_{yx}^A}{4} & \frac{\sigma_{yz}^A}{2} \\ \frac{\sqrt{3}\sigma_{zy}^A}{2} & \frac{\sigma_{zy}^A}{2} & 0 \end{pmatrix}$     |
| F          | $\begin{pmatrix} 0 & 0 & 0 \\ 0 & 0 & 0 \\ -\frac{\sqrt{3}\sigma_{zy}^A}{2} & \frac{\sigma_{zy}^A}{2} & 0 \end{pmatrix}$  | $\begin{pmatrix} -\frac{\sqrt{3}\sigma_{xy}^A}{4} - \frac{\sqrt{3}\sigma_{yx}^A}{4} & \frac{\sigma_{xy}^A}{4} - \frac{3\sigma_{yx}^A}{4} & -\frac{\sqrt{3}\sigma_{yz}^A}{2} \\ -\frac{3\sigma_{xy}^A}{4} + \frac{\sigma_{yx}^A}{4} & \frac{\sqrt{3}\sigma_{xy}^A}{4} + \frac{\sqrt{3}\sigma_{yx}^A}{4} & \frac{\sigma_{yz}^A}{2} \\ -\frac{\sqrt{3}\sigma_{zy}^A}{2} & \frac{\sigma_{zy}^A}{2} & 0 \end{pmatrix}$   |

TABLE III. The  $\mathcal{T}$ -even Edelstein effect symmetry tensors for the LuFeO<sub>3</sub>.

| sublattice | no SOC                                                                                                                                                                                                                                                                                                                                                       | SOC                                                                                                                                                                                                                                                                                                                                                                                                                           |
|------------|--------------------------------------------------------------------------------------------------------------------------------------------------------------------------------------------------------------------------------------------------------------------------------------------------------------------------------------------------------------|-------------------------------------------------------------------------------------------------------------------------------------------------------------------------------------------------------------------------------------------------------------------------------------------------------------------------------------------------------------------------------------------------------------------------------|
| A          | $\begin{pmatrix} \sigma_{xx}^A & 0 & \sigma_{xz}^A \\ 0 & \sigma_{yy}^A & 0 \\ 0 & 0 & 0 \end{pmatrix}$                                                                                                                                                                                                                                                      | $\begin{pmatrix} \sigma_{xx}^A & 0 & \sigma_{xz}^A \\ 0 & \sigma_{yy}^A & 0 \\ \sigma_{zx}^A & 0 & \sigma_{zz}^A \end{pmatrix}$                                                                                                                                                                                                                                                                                               |
| B          | $\begin{pmatrix} \frac{\sigma_{xx}^A}{4} + \frac{3\sigma_{yy}^A}{4} & -\frac{\sqrt{3}\sigma_{xx}^A}{4} + \frac{\sqrt{3}\sigma_{yy}^A}{4} & -\frac{\sigma_{xz}^A}{2} \\ -\frac{\sqrt{3}\sigma_{xx}^A}{4} + \frac{\sqrt{3}\sigma_{yy}^A}{4} & \frac{3\sigma_{xx}^A}{4} + \frac{\sigma_{yy}^A}{4} & \frac{\sqrt{3}\sigma_{xz}^A}{2} \\ 0 & 0 & 0 \end{pmatrix}$ | $\begin{pmatrix} \frac{\sigma_{xx}^A}{4} + \frac{3\sigma_{yy}^A}{4} & -\frac{\sqrt{3}\sigma_{xx}^A}{4} + \frac{\sqrt{3}\sigma_{yy}^A}{4} & -\frac{\sigma_{xz}^A}{2} \\ -\frac{\sqrt{3}\sigma_{xx}^A}{4} + \frac{\sqrt{3}\sigma_{yy}^A}{4} & \frac{3\sigma_{xx}^A}{4} + \frac{\sigma_{yy}^A}{4} & \frac{\sqrt{3}\sigma_{xz}^A}{2} \\ -\frac{\sigma_{zx}^A}{2} & \frac{\sqrt{3}\sigma_{zx}^A}{2} & \sigma_{zz}^A \end{pmatrix}$ |
| C          | $\begin{pmatrix} \frac{\sigma_{xx}^A}{4} + \frac{3\sigma_{yy}^A}{4} & \frac{\sqrt{3}\sigma_{xx}^A}{4} - \frac{\sqrt{3}\sigma_{yy}^A}{4} & -\frac{\sigma_{xz}^A}{2} \\ \frac{\sqrt{3}\sigma_{xx}^A}{4} - \frac{\sqrt{3}\sigma_{yy}^A}{4} & \frac{3\sigma_{xx}^A}{4} + \frac{\sigma_{yy}^A}{4} & -\frac{\sqrt{3}\sigma_{xz}^A}{2} \\ 0 & 0 & 0 \end{pmatrix}$  | $\begin{pmatrix} \frac{\sigma_{xx}^A}{4} + \frac{3\sigma_{yy}^A}{4} & \frac{\sqrt{3}\sigma_{xx}^A}{4} - \frac{\sqrt{3}\sigma_{yy}^A}{4} & -\frac{\sigma_{xz}^A}{2} \\ \frac{\sqrt{3}\sigma_{xx}^A}{4} - \frac{\sqrt{3}\sigma_{yy}^A}{4} & \frac{3\sigma_{xx}^A}{4} + \frac{\sigma_{yy}^A}{4} & -\frac{\sqrt{3}\sigma_{xz}^A}{2} \\ -\frac{\sigma_{zx}^A}{2} & -\frac{\sqrt{3}\sigma_{zx}^A}{2} & \sigma_{zz}^A \end{pmatrix}$ |
| D          | $\begin{pmatrix} \sigma_{xx}^A & 0 & -\sigma_{xz}^A \\ 0 & \sigma_{yy}^A & 0 \\ 0 & 0 & 0 \end{pmatrix}$                                                                                                                                                                                                                                                     | $\begin{pmatrix} \sigma_{xx}^A & 0 & -\sigma_{xz}^A \\ 0 & \sigma_{yy}^A & 0 \\ -\sigma_{zx}^A & 0 & \sigma_{zz}^A \end{pmatrix}$                                                                                                                                                                                                                                                                                             |
| E          | $\begin{pmatrix} \frac{\sigma_{xx}^A}{4} + \frac{3\sigma_{yy}^A}{4} & -\frac{\sqrt{3}\sigma_{xx}^A}{4} + \frac{\sqrt{3}\sigma_{yy}^A}{4} & \frac{\sigma_{xz}^A}{2} \\ -\frac{\sqrt{3}\sigma_{xx}^A}{4} + \frac{\sqrt{3}\sigma_{yy}^A}{4} & \frac{3\sigma_{xx}^A}{4} + \frac{\sigma_{yy}^A}{4} & -\frac{\sqrt{3}\sigma_{xz}^A}{2} \\ 0 & 0 & 0 \end{pmatrix}$ | $\begin{pmatrix} \frac{\sigma_{xx}^A}{4} + \frac{3\sigma_{yy}^A}{4} & -\frac{\sqrt{3}\sigma_{xx}^A}{4} + \frac{\sqrt{3}\sigma_{yy}^A}{4} & \frac{\sigma_{xz}^A}{2} \\ -\frac{\sqrt{3}\sigma_{xx}^A}{4} + \frac{\sqrt{3}\sigma_{yy}^A}{4} & \frac{3\sigma_{xx}^A}{4} + \frac{\sigma_{yy}^A}{4} & -\frac{\sqrt{3}\sigma_{xz}^A}{2} \\ \frac{\sigma_{zx}^A}{2} & -\frac{\sqrt{3}\sigma_{zx}^A}{2} & \sigma_{zz}^A \end{pmatrix}$ |
| F          | $\begin{pmatrix} \frac{\sigma_{xx}^A}{4} + \frac{3\sigma_{yy}^A}{4} & \frac{\sqrt{3}\sigma_{xx}^A}{4} - \frac{\sqrt{3}\sigma_{yy}^A}{4} & \frac{\sigma_{xz}^A}{2} \\ \frac{\sqrt{3}\sigma_{xx}^A}{4} - \frac{\sqrt{3}\sigma_{yy}^A}{4} & \frac{3\sigma_{xx}^A}{4} + \frac{\sigma_{yy}^A}{4} & \frac{\sqrt{3}\sigma_{xz}^A}{2} \\ 0 & 0 & 0 \end{pmatrix}$    | $\begin{pmatrix} \frac{\sigma_{xx}^A}{4} + \frac{3\sigma_{yy}^A}{4} & \frac{\sqrt{3}\sigma_{xx}^A}{4} - \frac{\sqrt{3}\sigma_{yy}^A}{4} & \frac{\sigma_{xz}^A}{2} \\ \frac{\sqrt{3}\sigma_{xx}^A}{4} - \frac{\sqrt{3}\sigma_{yy}^A}{4} & \frac{3\sigma_{xx}^A}{4} + \frac{\sigma_{yy}^A}{4} & \frac{\sqrt{3}\sigma_{xz}^A}{2} \\ \frac{\sigma_{zx}^A}{2} & \frac{\sqrt{3}\sigma_{zx}^A}{2} & \sigma_{zz}^A \end{pmatrix}$     |

TABLE IV. The  $\mathcal{T}$ -odd Edelstein effect symmetry tensors for the LuFeO<sub>3</sub>.

### MN<sub>3</sub>SN CALCULATIONS

In Fig. S1 we give the calculation of the local Edelstein effect in Mn<sub>3</sub>Sn for the sublattices A, B and C. The sublattices A', B' and C' are connected by inversion symmetry to the sublattices shown here and thus they must have the opposite Edelstein effect.

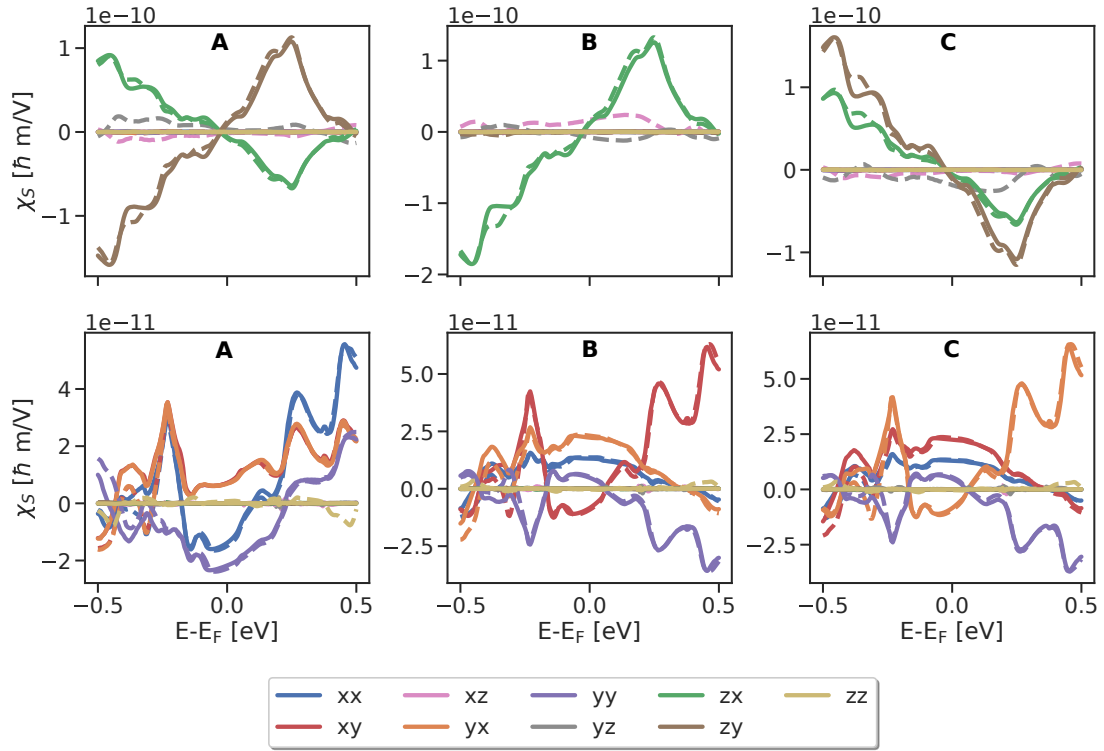

FIG. S1. Calculation of the local Edelstein effect in  $\text{Mn}_3\text{Sn}$  with (dashed lines) and without (solid lines) spin-orbit coupling. The labeling of the sublattices is given in Fig. 2 of the main text.

### LUFEO<sub>3</sub> CALCULATIONS

Here we give the result of the Edelstein effect calculations in  $\text{LuFeO}_3$  for all the sublattices. In Fig. S2 we label the different sublattices and in Fig. S3 we show the result of the calculations.

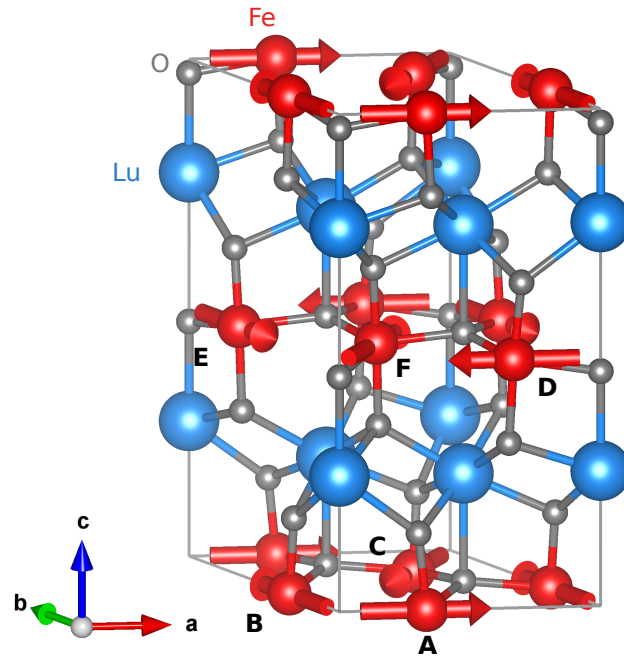

FIG. S2. LuFeO<sub>3</sub> structure with sublattice labels.

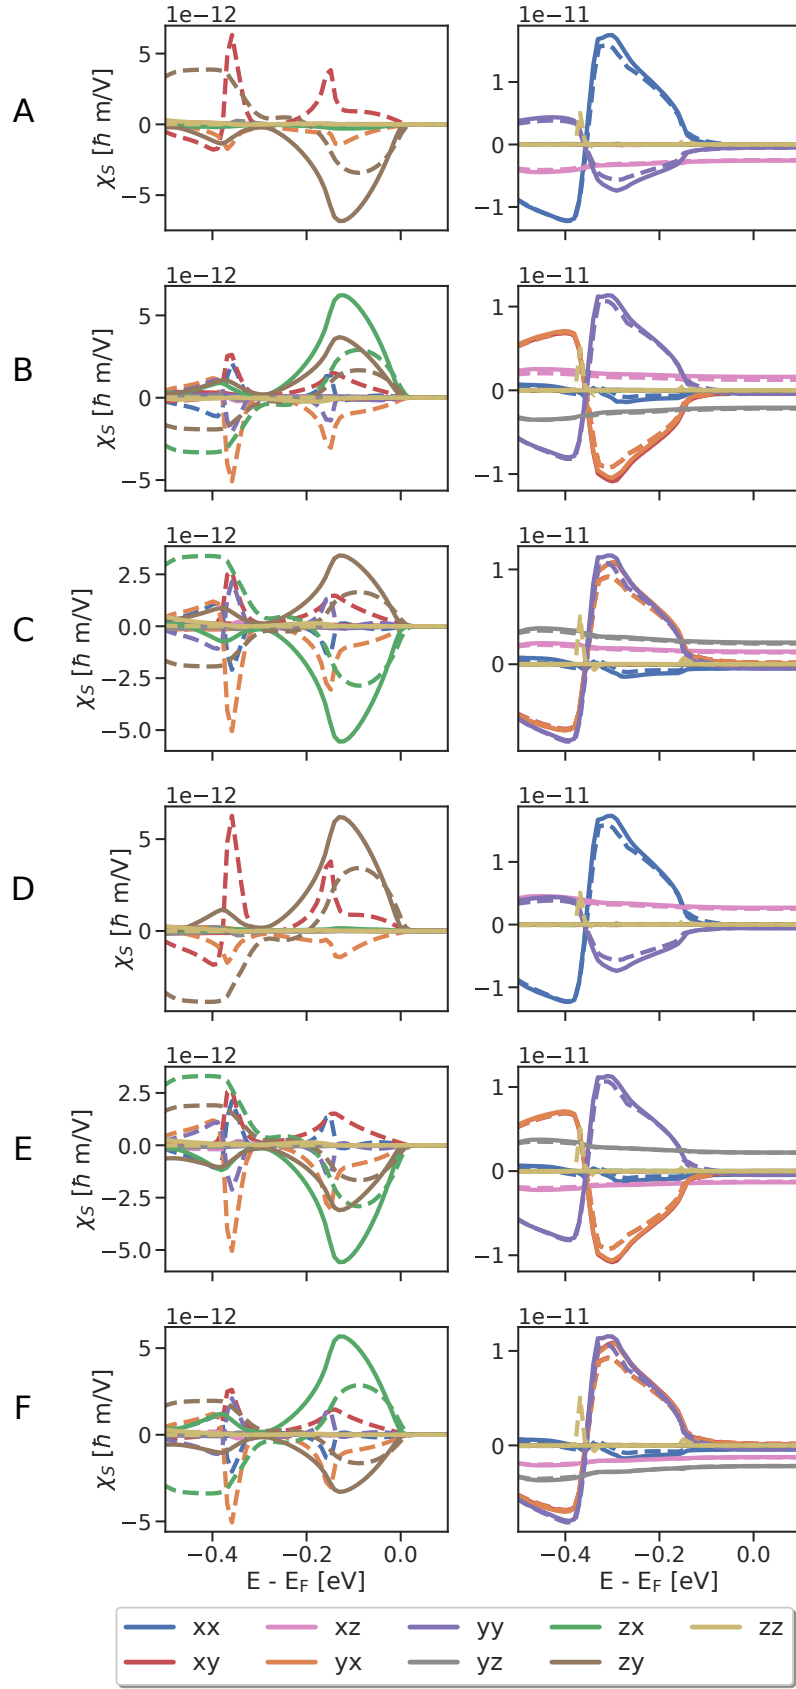

FIG. S3. Edelman effect calculations in LuFeO<sub>3</sub> with and without spin-orbit coupling. The left/right column corresponds to the  $\mathcal{T}$ -even and  $\mathcal{T}$ -odd components respectively.

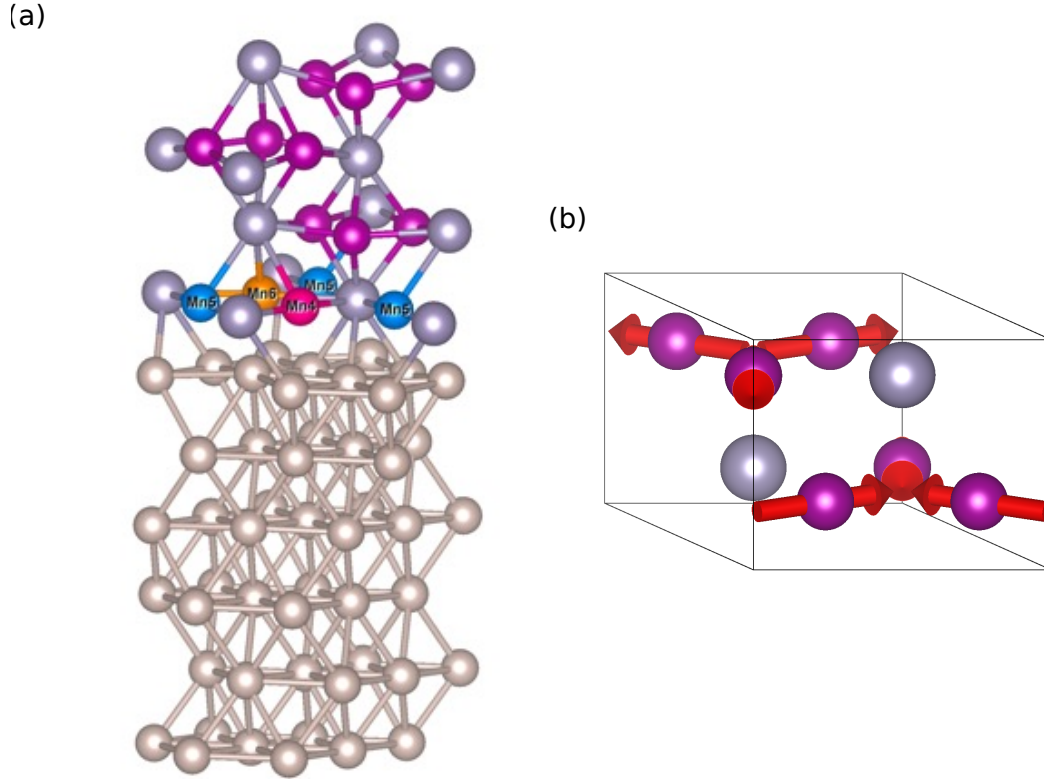

FIG. S4. (a) Mn<sub>3</sub>Sn/Ru(0001) structure with sublattice labels. (b) The magnetic order used for the slab calculations.

### MN<sub>3</sub>SN/RU(0001) DFT CALCULATIONS

For illustration, we include here also preliminary results of Edelstein effect calculations on Mn<sub>3</sub>Sn/Ru(0001) slab. We note that these calculations use a slightly different magnetic phase for Mn<sub>3</sub>Sn, as shown in Fig. S4(b). The present calculations are performed in the framework of the density functional theory (DFT) using VASP code. The parameter conditions mirror those outlined in the main text for bulk calculations of Mn<sub>3</sub>Sn and LuFeO<sub>3</sub>. The Brillouin zone integration is executed employing an  $(11 \times 11 \times 1)$   $k$ -points mesh. The interface model was calculated using a Mn<sub>3</sub>Sn/Ru surface, which represents a slab with 4 Mn<sub>3</sub>Sn and 6 Ru layers, stacked in the hexagonal growth direction [0001]. The slabs are separated from their periodic replicas in the [0001] direction by a 17 Å vacuum layer. During the geometry optimization stage, relaxation of all slab atoms is performed until the forces acting on them do not exceed 0.01 eV/Å. All calculations were carried out without considering the spin-orbit coupling interaction. In the Wannierization process, we employed the d orbitals for the Ru and Mn atoms, while the p orbitals were utilized for the Sn atoms. The frozen energy window was set to  $E_F = +1eV$ . In our linear response calculations, we employed the Linres code with a  $480 \times 480 \times 1$  k-mesh.

The results for the  $\mathcal{T}$ -odd and  $\mathcal{T}$ -even components of the torque, projected on the three magnetic sublattices as indicated in the sketch of the heterostructure, Fig. S4, are reported in Figs. S5 and S6, respectively. Two comments are in order: first, the overall magnitude of the effect is comparable to that reported in Fig. 5 of the main text and computed with a model system. From our viewpoint, this is not surprising as the band structure of this metallic heterostructure is very dense and the spin transport is rather governed by the interplay between the magnetic configuration, the bandwidth, and the interfacial orbital hybridization. In the presence of a large number of orbitals, as is the case here, one expects that the details in the band structure should have a reduced impact.

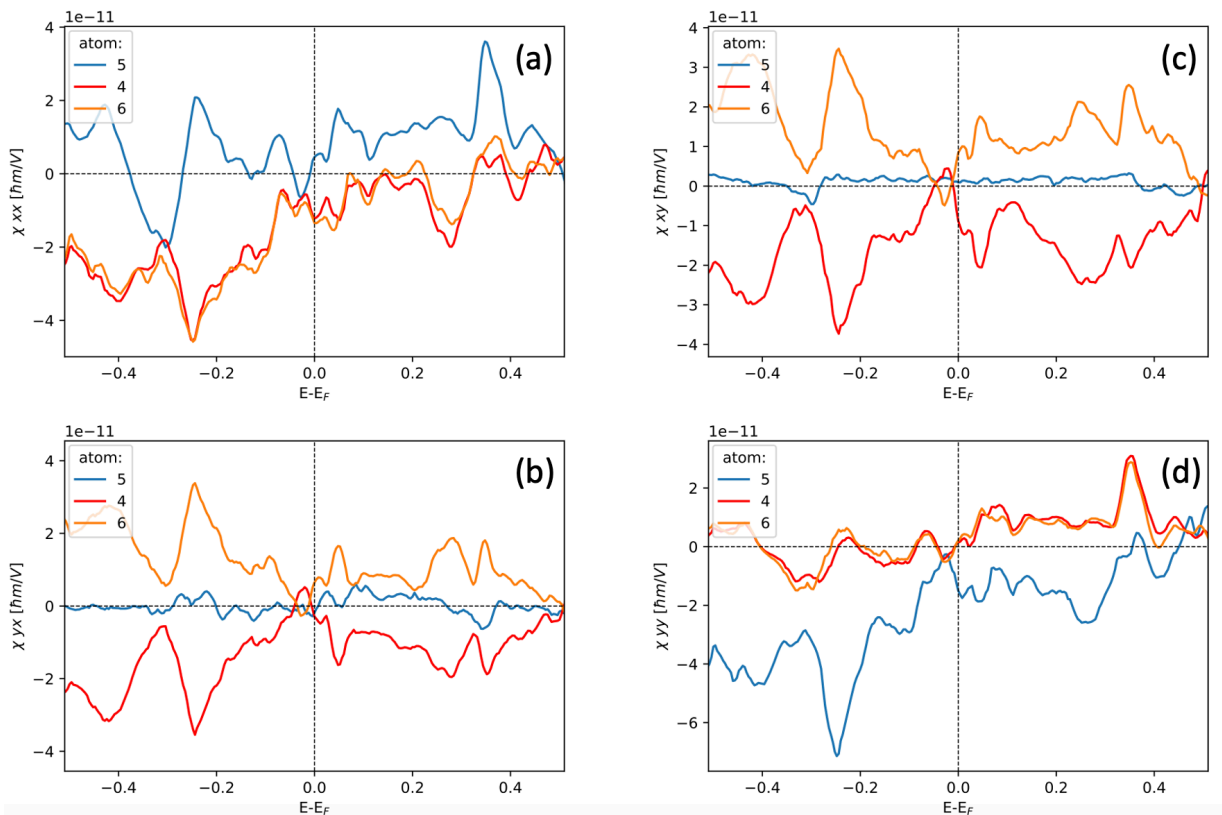

FIG. S5.  $\mathcal{T}$ -odd components of the local Edelstein effect projected on the three magnetic sublattices, as indicated on the crystal structure.

### MN<sub>3</sub>SN/RU(0001) TIGHT-BINDING CALCULATIONS

Since the DFT calculations of the bilayer slab systems are numerically very demanding we have also performed tight-binding calculations of the Mn<sub>3</sub>Sn/Ru bilayer system. This allows considering larger systems than in the DFT calculations. These calculations allow comparing with the DFT calculations, although we note that the setup of the system is not exactly the same and the DFT calculations use a slightly different magnetic structure than considered here and for the bulk calculations. The calculations utilize a simple non-relativistic tight-binding model similar to the one used for the 3Q system and the Mn<sub>3</sub>Ir bilayer calculations defined in Eq. (3) of the main text. The only distinction is that this system require hoppings beyond nearest neighbor. We consider up to 5-th nearest neighbor and scale the hoppings such that  $t = 1 \text{ eV} * d_{nn}^2/d$ , where  $d_{nn}$  is the nearest neighbour distance and  $d$  is the distance of the given hopping. We consider  $J = 1.7 \text{ eV}$  as for the Mn<sub>3</sub>Ir bilayer and we set  $E_F = 0.5 \text{ eV}$ . For these calculations we do not include the Sn atoms as they don't change the symmetry of the structure and are not necessary for the simple model we use. Apart from the omission of the Sn atoms the structure is analogous to the one used for the DFT calculations S4, except with different number of layers. We use 3 atomic layers for Ru and 10 unit cells (corresponding to 20 Mn layers) of Mn<sub>3</sub>Sn.

The results of the calculations are shown in Fig. S7. These show that as expected the interfaces break the global inversion symmetry, which means that the Edelstein effect within each unit cell does not cancel out. The symmetry breaking is largest close to the interfaces. Such Edelstein effect will likely lead to a torque that can efficiently manipulate the magnetic order, however, studying the magnetic dynamics induced by the torque is beyond the scope of this work.



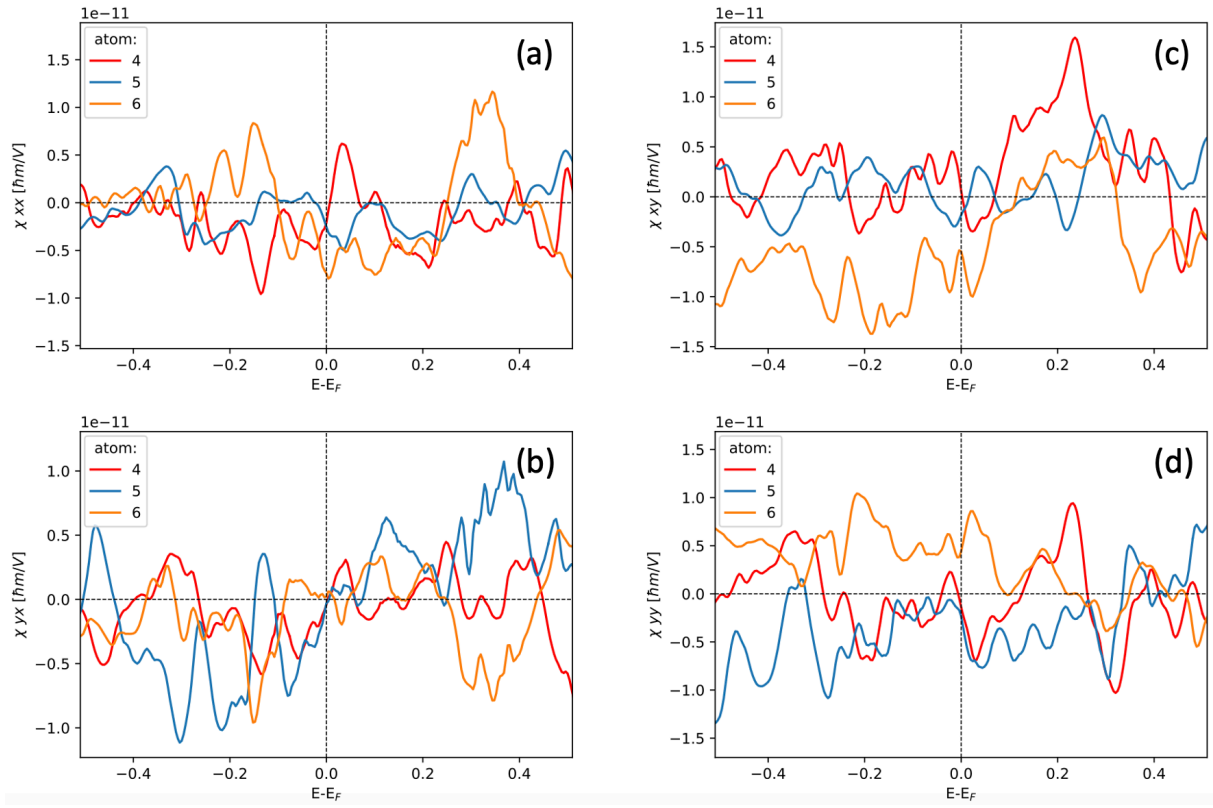

FIG. S6.  $\mathcal{T}$ -even components of the local Edelstein effect projected on the three magnetic sublattices, as indicated on the crystal structure.

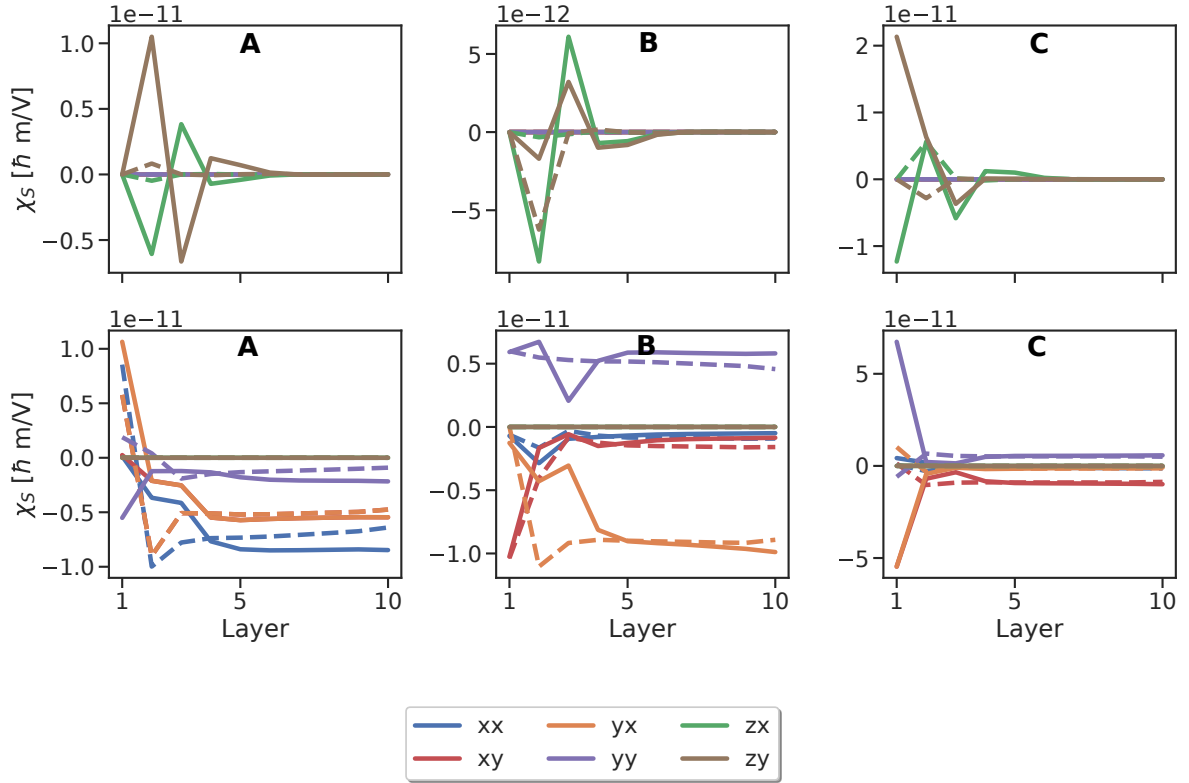

FIG. S7. The results of the Edelstein effect in the tight-binding model  $\text{Mn}_3\text{Sn}/\text{Ru}$  calculations. The top row shows the  $\mathcal{T}$ -even calculations and the bottom row the  $\mathcal{T}$ -odd calculations. The dashed line shows the comparison to the sublattices that would be connected by inversion symmetry in the bulk: for example, for the sublattice  $A$ , the solid line shows the result for sublattice  $A$ , whereas the dashed line shows *minus* the result of the sublattice  $A'$ . Thus if the solid and dashed lines are on top of each other this shows that the Edelstein effect satisfies the bulk inversion symmetry, when they differ it shows the inversion symmetry breaking.

## NON-RELATIVISTIC SYMMETRY ANALYSIS

For the non-relativistic symmetry analysis we use the Symmetr code [1] in which we have implemented an algorithm for identifying the non-relativistic symmetry operations. Once the non-relativistic symmetry operations are identified the procedure for obtaining the symmetry restricted form of the response tensors is the same as in the case of relativistic symmetry, as described in Ref. [2].

In the absence of spin-orbit coupling, the symmetry is described by the so-called spin-groups [3, 4]. These differ from the magnetic space groups that describe the relativistic symmetry in that the spin and spatial rotations are decoupled. That is, with spin-orbit coupling a rotation is composed of a real space rotation and equivalent spin rotation. Without spin-orbit coupling, however, the spin rotation can be different from the real space part. Here we briefly describe the procedure for obtaining all the non-relativistic symmetries. A detailed description of the algorithm and the code will be published elsewhere.

In the absence of spin-orbit coupling, the symmetry operations for a lattice are composed of rotations (2-fold, 3-fold, 4-fold and 6-fold), spatial inversion, pure spin rotation (that can be in general arbitrary) and time-reversal. In a non-magnetic system, the spin group is a product of a crystallographic space group, the group containing all spin rotations and time-reversal. In a magnetic system, the symmetry is reduced. For example, magnetic systems are not invariant under time-reversal or an arbitrary spin-rotation.

Since all the symmetry operations of the magnetic system must also be symmetry operations of the non-magnetic system, we use the symmetry operations of the non-magnetic system as a starting point. We assume that the symmetry of the system is described by assigning magnetic moments to each site. This is usually satisfied; however, it may also happen that the whole magnetization density needs to be taken into account. In such a case, the symmetry analysis based on the approach used here would be higher than in the real system. However, the general principles outlined here would still apply.

The procedure for obtaining the non-relativistic symmetry operations is as follows:

1. Identify all the non-magnetic symmetry operations. For this we use the Findsym code. We consider only the spatial part of the symmetry operations and we need to find any spin rotations that, together with the spatial component, are symmetries of the magnetic system.
2. Because the spatial and spin transformations are decoupled, the only aspect of the spatial symmetry operations that matters for the spin rotation is how they permute the magnetic atoms. That is, under a combined spin-rotation  $R_s$  and spatial transformation  $R$ , the magnetic moments of the system will transform as  $\mathbf{M}_i \rightarrow R_s \mathbf{M}_{p_i}$ , where  $p_i$  denotes the permutation corresponding to  $R$ . The combined operation will be a symmetry of the system if for all moments  $\mathbf{M}_i \rightarrow R_s \mathbf{M}_{p_i}$ .

For example, a symmetry operation may transform atom  $A$  to atom  $B$ , atom  $B$  to atom  $C$  and atom  $C$  to atom  $A$ . We denote this operation as  $A \rightarrow B \rightarrow C \rightarrow A$  and refer to as a permutation chain. Each permutation chain must end with the same atom as the one it starts with. Each symmetry operation is described by one or more such chains.

3. Now for every permutation chain we have to find the spin-rotations that leave it invariant, that is spin-rotations such that  $R_s \mathbf{M}_{c_i} = \mathbf{M}_{c_{i+1}}$ , where  $\mathbf{M}_{c_i}$  denotes the magnetic moment of each chain. This has to be done separately with and without time-reversal. In the following we assume that all the moments have same magnitude, since otherwise they cannot be symmetry related.

Since the last element of the chain must be the same as the first, we have a condition:

$$\text{Without time-reversal: } \mathbf{M}_A = R_s^n \mathbf{M}_A \tag{1}$$

$$\text{With time-reversal: } \mathbf{M}_A = (-1)^n R_s^n \mathbf{M}_A \tag{2}$$

where  $n$  is the number of unique atoms in the chain (that is for chain  $A \rightarrow B \rightarrow C \rightarrow A$ , the length is 3). From this, it is possible to determine the necessary conditions for the existence of a spin-rotation that leaves the chain invariant.

If the chain is collinear then the symmetry analysis is quite simple. The only two relevant symmetries are an arbitrary rotation around the collinear axis  $R_s^{\parallel}$  and a  $\pi$  rotation around any perpendicular axis  $R_s^{\perp}$ . The system can either be invariant under  $R_s^{\parallel}$  or under  $R_s^{\perp} R_s^{\parallel}$ . In this case, the chain has a continuous spin-rotation symmetry.

For a non-collinear system, the condition for the rotation angle  $\theta$  are:

- Without time-reversal or with time-reversal and  $n$  even:  $\theta = \frac{i\pi}{n}$ , where  $i$  is an even integer.
  - With time-reversal and  $n$  odd:  $\theta = \frac{i\pi}{n}$ , where  $i$  an odd integer.
4. For each permutation pair in the chain, we now have to determine the spin-rotations that leave it invariant taking into account the restriction on  $\theta$ . We do this by first considering each pair separately. That is, for example, for the chain  $A \rightarrow B \rightarrow C \rightarrow A$  we have to find spin-rotations  $R_s$  that satisfy  $R_s A = B$ ,  $R_s B = C$  and  $R_s C = A$  and then find the spin-rotations that are common to all pairs.

In general, it can be shown that a rotation  $R_s$  with an angle  $\theta$  connecting two vectors  $\mathbf{M}_A$  and  $\mathbf{M}_B$ , will exist if  $\mathbf{M}_A \cdot \mathbf{M}_B \geq \cos(\theta)$ , that is the angle between the two vectors must be greater or equal to  $\theta$ . The rotation axes will be given by:

$$\begin{aligned}
\mathbf{n}^{1+} &= \cos(\alpha) \frac{\mathbf{M}_A + \mathbf{M}_B}{\|\mathbf{M}_A + \mathbf{M}_B\|} + \sin(\alpha) \frac{\mathbf{M}_A \times \mathbf{M}_B}{\|\mathbf{M}_A \times \mathbf{M}_B\|}, \\
\mathbf{n}^{1-} &= -\cos(\alpha) \frac{\mathbf{M}_A + \mathbf{M}_B}{\|\mathbf{M}_A + \mathbf{M}_B\|} - \sin(\alpha) \frac{\mathbf{M}_A \times \mathbf{M}_B}{\|\mathbf{M}_A \times \mathbf{M}_B\|}, \\
\mathbf{n}^{2+} &= \cos(\alpha) \frac{\mathbf{M}_A + \mathbf{M}_B}{\|\mathbf{M}_A + \mathbf{M}_B\|} - \sin(\alpha) \frac{\mathbf{M}_A \times \mathbf{M}_B}{\|\mathbf{M}_A \times \mathbf{M}_B\|}, \\
\mathbf{n}^{2-} &= -\cos(\alpha) \frac{\mathbf{M}_A + \mathbf{M}_B}{\|\mathbf{M}_A + \mathbf{M}_B\|} + \sin(\alpha) \frac{\mathbf{M}_A \times \mathbf{M}_B}{\|\mathbf{M}_A \times \mathbf{M}_B\|},
\end{aligned} \tag{3}$$

where

$$\alpha = \arccos \left( \sqrt{\frac{2(\mathbf{M}_A \cdot \mathbf{M}_B - \cos(\theta))}{(1 - \cos(\theta))(1 + \mathbf{M}_A \cdot \mathbf{M}_B)}} \right). \tag{4}$$

The  $\pm$  axes correspond to opposite sense of rotation. In general only one of the two is correct. It can easily be checked, which one is the correct one for a given  $\mathbf{M}_A$ ,  $\mathbf{M}_B$  and  $\theta$ .

5. Once we have the spin-rotations that are symmetries of each permutation chain, we find the spin-rotations (if any) that are common to all chains. These, together with the spatial part of the symmetry corresponding to the permutation and potentially time-reversal, are symmetries of the system.

## SYMMETRIZATION OF TENSORS

Here we briefly describe the procedure we use for obtaining the symmetry restricted form of response tensors. This has also been discussed in Ref. [2]. The basic process is:

1. Obtain the list of symmetry operations for a given crystal and magnetic structure. For this we use the algorithm described in the previous section.
2. For each symmetry operation we determine the transformation of the response tensor and set up a system of linear equations that have to be satisfied for the tensor. For symmetry operations containing time-reversal we have to separate the tensor into  $\mathcal{T}$ -even and  $\mathcal{T}$ -odd parts. In general for the Edelstein effect response tensor, for symmetry operation without time-reversal we can write the transformation as:

$$\chi_{ij} = R_{ik}^s \chi_{kl} (R^E)^{-1}_{lj}, \tag{5}$$

where  $R^s$ ,  $R^E$  are the matrices representing the transformation of the spin and the electric field under the symmetry operation. For symmetry operations with time-reversal the transformation can be written as:

$$\chi_{ij}^{\text{even}} = -R_{ik}^s \chi_{kl}^{\text{even}} (R^E)^{-1}_{lj}, \tag{6}$$

$$\chi_{ij}^{\text{odd}} = R_{ik}^s \chi_{kl}^{\text{odd}} (R^E)^{-1}_{lj}, \tag{7}$$

We note that since spin is odd under time-reversal and the electric field is even, the  $+$  sign corresponds to the odd part of the response tensor and  $-$  to the even part.

3. Eqs. (5), (6),(7) form a set of linear equations for components of the response tensor, which have to be solved. This system of equations either has no solutions, in which case the response tensor is null or it has infinitely many solutions. These solutions can be parametrized with free variables and these free variables are then the independent components of the response tensor. The number of free variables is the dimension of the vector space formed by the solutions of the equation system.

The system of equations that has to be solved can be written as:

$$Y\chi^v = 0, \quad (8)$$

where  $\chi^v$  is the vector formed from the components of the  $\chi_{ij}$  matrix and  $Y$  is a matrix representing the transformation of the tensor by the symmetry operation. In the present case, where  $\chi$  is a rank 2 tensor,  $Y$  is a 9x9 matrix. The easiest way how to solve this is using the Gaussian elimination, i.e. converting the matrix  $Y$  to reduced row echelon form. This allows directly eliminating the dependent tensor components. However, the Gaussian elimination is not numerically stable and thus for numerical solution it is better to use the SVD decomposition. We first use SVD decomposition to determine the null space of matrix  $Y$ , i.e. the vector space of all the solutions and then use the gaussian elimination on the basis vectors of the null space, which allows eliminating the dependent variables.

4. This procedure is then repeated for every symmetry operation in the group. It is sufficient to consider only the generators of the group since they fully determine the symmetry of the tensor.

This whole procedure is implemented in the open-source code Symmetr [1]. We describe in the next section how this code can be directly used for determining the symmetry of the materials from MAGNDATA.

## SYMMETRY ANALYSIS FOR MATERIALS FROM MAGNDATA

We have used the approach outlined in the previous section to analyze the symmetry of the non-relativistic Edelstein effect for all the materials from MAGNDATA [5, 6]. In Table V we give only the information on whether each material has a net or a sublattice non-relativistic Edelstein effect. In a separate file 'sot\_database\_out.json' we give the full tensors for each material. This file can be loaded into python as follows:

```
import pandas as pd
df = pd.read_json('sot_database_out.json')
```

The column 'X\_noso' contains the symmetry tensors. These can be converted into python dictionary using the 'eval' command. The individual entries of the dictionary are the even and odd symmetry tensors for the total and sublattice Edelstein effect. Note that we consider here only non-equivalent magnetic sites for the symmetry analysis.

The symmetry tensors can be converted into internal format used by the Symmetr code, which allows for easy printing or manipulation of the tensors. To do so the Symmetr python package must be installed, which can be done using pip. On linux:

```
pip install symmetr
```

For example, to convert, the total even tensor for the first row of the table:

```
from symmetr.tensors import Tensor
X = Tensor.load(eval(df.loc[0]['X_noso']))['tot']['even']
X.pprint()
```

Alternatively the tensors for the MAGNDATA materials can be directly obtained using the Symmetr code by specifying their id. For example to obtain the non-relativistic symmetry of the Edelstein effect for LuFeO<sub>3</sub>:

```
symmetr res s E --magndata 0.117 --noso
```

TABLE V: Non-relativistic Edelstein effect symmetry for materials from MAGNDATA. The index refers to the MAGNDATA index. For each material we show whether it has global inversion symmetry, whether it is antiferromagnetic, whether a global non-relativistic Edelstein effect is allowed or if it is allowed on some magnetic sublattice.

| index | material    | inversion | antiferromagnetic | total | sublattice |
|-------|-------------|-----------|-------------------|-------|------------|
| 0.2   | Cd2Os2O7    | ✓         | ✓                 | ✗     | ✗          |
| 0.6   | YMnO3       | ✗         | ✓                 | ✓     | ✓          |
| 0.7   | ScMnO3      | ✗         | ✓                 | ✓     | ✓          |
| 0.8   | ScMnO3      | ✗         | ✓                 | ✓     | ✓          |
| 0.9   | GdB4        | ✗         | ✓                 | ✓     | ✓          |
| 0.10  | DyFeO3      | ✗         | ✓                 | ✓     | ✓          |
| 0.11  | DyFeO3      | ✗         | ✗                 | ✓     | ✓          |
| 0.12  | U3(Al3Ru)4  | ✗         | ✓                 | ✓     | ✓          |
| 0.17  | FePO4       | ✗         | ✓                 | ✓     | ✓          |
| 0.20  | MnTe2       | ✓         | ✓                 | ✗     | ✗          |
| 0.26  | TmAgGe      | ✗         | ✗                 | ✓     | ✓          |
| 0.27  | Y(Fe2Ge)2   | ✗         | ✓                 | ✓     | ✓          |
| 0.28  | LiFe(SiO3)2 | ✗         | ✓                 | ✓     | ✓          |
| 0.29  | Er2Ti2O7    | ✓         | ✓                 | ✗     | ✗          |
| 0.30  | YbMnO3      | ✗         | ✓                 | ✗     | ✓          |
| 0.31  | HoMnO3      | ✗         | ✓                 | ✓     | ✓          |
| 0.32  | HoMnO3      | ✗         | ✓                 | ✓     | ✓          |
| 0.33  | HoMnO3      | ✗         | ✓                 | ✓     | ✓          |
| 0.36  | NiF2        | ✓         | ✗                 | ✗     | ✗          |
| 0.37  | U3Al2Si3    | ✗         | ✗                 | ✓     | ✓          |
| 0.39  | NaNd2RuO6   | ✓         | ✗                 | ✗     | ✓          |
| 0.40  | Mn2O3       | ✓         | ✓                 | ✗     | ✓          |
| 0.41  | Mn2O3       | ✓         | ✓                 | ✗     | ✓          |
| 0.42  | HoMnO3      | ✗         | ✓                 | ✓     | ✓          |
| 0.43  | HoMnO3      | ✗         | ✓                 | ✓     | ✓          |
| 0.44  | YMnO3       | ✗         | ✓                 | ✗     | ✓          |
| 0.46  | BaCaCo4O7   | ✗         | ✗                 | ✓     | ✓          |
| 0.47  | Gd2Sn2O7    | ✓         | ✓                 | ✗     | ✗          |
| 0.48  | Tb2Sn2O7    | ✓         | ✗                 | ✗     | ✗          |
| 0.49  | Ho2Ru2O7    | ✓         | ✗                 | ✗     | ✗          |
| 0.51  | Ho2Ru2O7    | ✓         | ✗                 | ✗     | ✗          |
| 0.64  | MnV2O4      | ✓         | ✗                 | ✗     | ✓          |
| 0.69  | Co2H25C15O7 | ✓         | ✗                 | ✗     | ✓          |
| 0.70  | Na3CoC2ClO6 | ✓         | ✓                 | ✗     | ✗          |
| 0.74  | Mn3CuN      | ✓         | ✓                 | ✗     | ✗          |
| 0.77  | Tb2Ti2O7    | ✓         | ✗                 | ✗     | ✗          |
| 0.78  | Ni(NO3)2    | ✓         | ✗                 | ✗     | ✗          |
| 0.80  | U2InPd2     | ✗         | ✓                 | ✓     | ✓          |
| 0.81  | U2SnPd2     | ✗         | ✓                 | ✓     | ✓          |
| 0.85  | KCo4(PO4)3  | ✓         | ✗                 | ✗     | ✓          |
| 0.88  | LiNiPO4     | ✗         | ✓                 | ✓     | ✓          |
| 0.90  | Rb2Fe2As2O9 | ✓         | ✓                 | ✗     | ✓          |
| 0.91  | Rb2Fe2As2O9 | ✓         | ✗                 | ✗     | ✓          |
| 0.96  | CoSO4       | ✓         | ✓                 | ✗     | ✗          |
| 0.97  | Fe(SbO2)2   | ✗         | ✓                 | ✗     | ✗          |
| 0.101 | Mn2GeO4     | ✓         | ✓                 | ✗     | ✓          |
| 0.102 | Mn2GeO4     | ✓         | ✓                 | ✗     | ✓          |
| 0.103 | Mn2GeO4     | ✓         | ✓                 | ✗     | ✓          |
| 0.104 | ErVO3       | ✓         | ✓                 | ✗     | ✗          |
| 0.106 | DyVO3       | ✓         | ✗                 | ✗     | ✓          |
| 0.107 | Ho2Ge2O7    | ✗         | ✓                 | ✓     | ✓          |
| 0.108 | Mn3Ir       | ✓         | ✓                 | ✗     | ✗          |
| 0.109 | Mn3Pt       | ✓         | ✓                 | ✗     | ✗          |
| 0.117 | LuFeO3      | ✗         | ✓                 | ✓     | ✓          |
| 0.119 | CoSe2O5     | ✗         | ✓                 | ✓     | ✓          |

Continued on next page

| index | material     | inversion | antiferromagnetic | total | sublattice |
|-------|--------------|-----------|-------------------|-------|------------|
| 0.121 | Li2Co(SO4)2  | ✓         | ✗                 | ✗     | ✗          |
| 0.127 | Dy           | ✓         | ✓                 | ✗     | ✓          |
| 0.129 | Cu3Mo2O9     | ✗         | ✓                 | ✓     | ✓          |
| 0.130 | Cu3Mo2O9     | ✗         | ✓                 | ✓     | ✓          |
| 0.132 | Mn(C2N3)2    | ✓         | ✗                 | ✗     | ✗          |
| 0.133 | Ni3B7ClO13   | ✗         | ✓                 | ✓     | ✓          |
| 0.134 | Mn3B7IO13    | ✗         | ✓                 | ✓     | ✓          |
| 0.135 | Ni3B7BrO13   | ✗         | ✓                 | ✓     | ✓          |
| 0.136 | Co3B7BrO13   | ✗         | ✓                 | ✓     | ✓          |
| 0.140 | Lu(Fe2Ge)2   | ✗         | ✓                 | ✓     | ✓          |
| 0.141 | Tb5Ge4       | ✗         | ✓                 | ✓     | ✓          |
| 0.145 | Co3TeO6      | ✗         | ✓                 | ✓     | ✓          |
| 0.150 | NiS2         | ✓         | ✓                 | ✗     | ✗          |
| 0.152 | LiFePO4      | ✗         | ✓                 | ✓     | ✓          |
| 0.157 | Yb2Sn2O7     | ✓         | ✗                 | ✗     | ✗          |
| 0.158 | Yb2Ti2O7     | ✓         | ✗                 | ✗     | ✗          |
| 0.159 | DyCoO3       | ✗         | ✓                 | ✓     | ✓          |
| 0.160 | TbCoO3       | ✗         | ✓                 | ✓     | ✓          |
| 0.164 | Y2MnCoO6     | ✓         | ✗                 | ✗     | ✗          |
| 0.165 | SrMnVHO5     | ✗         | ✗                 | ✓     | ✓          |
| 0.167 | Nd3Mg2Sb3O14 | ✓         | ✗                 | ✗     | ✗          |
| 0.168 | Fe2H4NF6     | ✓         | ✓                 | ✗     | ✓          |
| 0.169 | U3As4        | ✗         | ✗                 | ✗     | ✓          |
| 0.170 | U3P4         | ✗         | ✗                 | ✗     | ✓          |
| 0.171 | DyScO3       | ✗         | ✓                 | ✓     | ✓          |
| 0.175 | Ca2CoSi2O7   | ✗         | ✗                 | ✓     | ✓          |
| 0.177 | Mn3GaN       | ✓         | ✓                 | ✗     | ✗          |
| 0.179 | FeH10N2Cl5O  | ✗         | ✗                 | ✓     | ✓          |
| 0.182 | KCrF4        | ✗         | ✓                 | ✓     | ✓          |
| 0.184 | Nd5Si4       | ✗         | ✗                 | ✓     | ✓          |
| 0.185 | Nd5Ge4       | ✓         | ✗                 | ✗     | ✓          |
| 0.188 | CeMnAsO      | ✗         | ✓                 | ✓     | ✓          |
| 0.191 | BaCuF4       | ✗         | ✗                 | ✓     | ✓          |
| 0.192 | RbFe2F6      | ✓         | ✓                 | ✗     | ✓          |
| 0.196 | Nb2Co4O9     | ✗         | ✓                 | ✓     | ✓          |
| 0.197 | Nb2Co4O9     | ✗         | ✓                 | ✓     | ✓          |
| 0.199 | Mn3Sn        | ✓         | ✓                 | ✗     | ✓          |
| 0.200 | Mn3Sn        | ✓         | ✓                 | ✗     | ✓          |
| 0.203 | Mn3Ge        | ✓         | ✗                 | ✗     | ✓          |
| 0.204 | Ca2MnReO6    | ✓         | ✗                 | ✗     | ✗          |
| 0.207 | Tl5(Fe4Se5)2 | ✓         | ✓                 | ✗     | ✓          |
| 0.210 | Sr2CoOsO6    | ✓         | ✓                 | ✗     | ✗          |
| 0.218 | Co2SiO4      | ✓         | ✓                 | ✗     | ✓          |
| 0.219 | Co2SiO4      | ✓         | ✓                 | ✗     | ✓          |
| 0.220 | Mn2SiO4      | ✓         | ✗                 | ✗     | ✓          |
| 0.221 | Fe2SiO4      | ✓         | ✓                 | ✗     | ✓          |
| 0.236 | Ca(Al2Fe)4   | ✓         | ✓                 | ✗     | ✗          |
| 0.237 | Er2Sn2O7     | ✓         | ✓                 | ✗     | ✗          |
| 0.238 | Er2Sn2O7     | ✓         | ✓                 | ✗     | ✗          |
| 0.240 | Er2Cu2O5     | ✗         | ✓                 | ✓     | ✓          |
| 0.242 | Tm2Cu2O5     | ✗         | ✗                 | ✓     | ✓          |
| 0.253 | Cs2FeH2Cl5O  | ✗         | ✗                 | ✓     | ✓          |
| 0.262 | FeCoPO5      | ✓         | ✓                 | ✗     | ✓          |
| 0.268 | Tb2MnNi      | ✗         | ✗                 | ✓     | ✓          |
| 0.269 | Tb2MnNi      | ✓         | ✗                 | ✗     | ✓          |
| 0.273 | Mn3ZnN       | ✓         | ✓                 | ✗     | ✗          |
| 0.279 | Mn3As        | ✓         | ✓                 | ✗     | ✓          |
| 0.280 | Mn3As        | ✓         | ✓                 | ✗     | ✓          |
| 0.281 | V2Co2O7      | ✗         | ✓                 | ✓     | ✓          |
| 0.287 | SrVCoHO5     | ✗         | ✓                 | ✓     | ✓          |

Continued on next page

| index | material      | inversion | antiferromagnetic | total | sublattice |
|-------|---------------|-----------|-------------------|-------|------------|
| 0.288 | NdMnO3        | ✓         | ✗                 | ✗     | ✗          |
| 0.289 | NdMnO3        | ✓         | ✗                 | ✗     | ✓          |
| 0.292 | NiTe2O5       | ✓         | ✓                 | ✗     | ✓          |
| 0.294 | Cu4H6BrO6F    | ✓         | ✗                 | ✗     | ✓          |
| 0.295 | Cu2H3ClO3     | ✓         | ✓                 | ✗     | ✓          |
| 0.296 | Cu2ClO3       | ✓         | ✗                 | ✗     | ✓          |
| 0.298 | BaNa2V2FeO8   | ✓         | ✗                 | ✗     | ✗          |
| 0.311 | CoGeO3        | ✗         | ✓                 | ✓     | ✓          |
| 0.313 | MnGeO3        | ✗         | ✓                 | ✓     | ✓          |
| 0.314 | ZrCo2(GeO3)4  | ✓         | ✗                 | ✗     | ✗          |
| 0.316 | DyCrWO6       | ✗         | ✓                 | ✓     | ✓          |
| 0.318 | Tm2MnCoO6     | ✓         | ✗                 | ✗     | ✓          |
| 0.319 | Tm2MnCoO6     | ✓         | ✗                 | ✗     | ✓          |
| 0.320 | U2InPd2       | ✗         | ✓                 | ✓     | ✓          |
| 0.321 | U2SnPd2       | ✗         | ✓                 | ✓     | ✓          |
| 0.324 | Yb2CdS4       | ✓         | ✓                 | ✗     | ✗          |
| 0.326 | Nd2Sn2O7      | ✓         | ✓                 | ✗     | ✗          |
| 0.328 | KMnF4         | ✓         | ✓                 | ✗     | ✗          |
| 0.337 | NdFeO3        | ✓         | ✓                 | ✗     | ✓          |
| 0.339 | Nd2HF2O7      | ✓         | ✓                 | ✗     | ✗          |
| 0.340 | Nd2Zr2O7      | ✓         | ✓                 | ✗     | ✗          |
| 0.342 | Tb3Ge5        | ✗         | ✓                 | ✓     | ✓          |
| 0.347 | Er2ReC2       | ✗         | ✓                 | ✓     | ✓          |
| 0.349 | Nd2NiO4       | ✓         | ✗                 | ✗     | ✓          |
| 0.350 | TbAlO3        | ✗         | ✓                 | ✓     | ✓          |
| 0.352 | TbFeO3        | ✓         | ✗                 | ✗     | ✓          |
| 0.353 | TbFeO3        | ✗         | ✓                 | ✓     | ✓          |
| 0.357 | CaFe5O7       | ✓         | ✗                 | ✗     | ✓          |
| 0.368 | CoH9C4NO6     | ✓         | ✗                 | ✗     | ✗          |
| 0.369 | CoH9C4NO6     | ✓         | ✗                 | ✗     | ✗          |
| 0.370 | NdMnO3        | ✓         | ✗                 | ✗     | ✗          |
| 0.371 | NdMnO3        | ✓         | ✗                 | ✗     | ✓          |
| 0.375 | La2CoIrO6     | ✓         | ✗                 | ✗     | ✗          |
| 0.377 | Mn3Ge         | ✓         | ✓                 | ✗     | ✓          |
| 0.385 | LiCoPO4       | ✗         | ✓                 | ✓     | ✓          |
| 0.387 | Fe3BO5        | ✗         | ✗                 | ✓     | ✓          |
| 0.388 | Al2Co3(SiO4)3 | ✗         | ✓                 | ✓     | ✓          |
| 0.394 | CdCu2(BO3)2   | ✗         | ✓                 | ✓     | ✓          |
| 0.396 | MnGaPt        | ✓         | ✗                 | ✗     | ✗          |
| 0.398 | Ca2RuO4       | ✓         | ✓                 | ✗     | ✗          |
| 0.407 | NdSi          | ✓         | ✗                 | ✗     | ✓          |
| 0.408 | PrSi          | ✓         | ✗                 | ✗     | ✓          |
| 0.409 | TmNi          | ✓         | ✗                 | ✗     | ✓          |
| 0.411 | Tb5Ge4        | ✗         | ✓                 | ✓     | ✓          |
| 0.412 | Tb5Ge4        | ✗         | ✓                 | ✓     | ✓          |
| 0.422 | EuMnSb2       | ✗         | ✓                 | ✓     | ✓          |
| 0.424 | EuMnSb2       | ✗         | ✓                 | ✓     | ✓          |
| 0.425 | Na2CoP2O7     | ✗         | ✓                 | ✓     | ✓          |
| 0.430 | Yb3Pt4        | ✗         | ✓                 | ✓     | ✓          |
| 0.431 | Cu(BO2)2      | ✗         | ✓                 | ✓     | ✓          |
| 0.437 | Ho3NiGe2      | ✓         | ✗                 | ✗     | ✓          |
| 0.438 | Pr3CoGe2      | ✓         | ✗                 | ✗     | ✓          |
| 0.440 | SrCu(TeO3)2   | ✗         | ✓                 | ✓     | ✓          |
| 0.441 | Nb2Fe4O9      | ✗         | ✓                 | ✓     | ✓          |
| 0.446 | MnCoGe        | ✓         | ✗                 | ✗     | ✓          |
| 0.449 | Tb2Pt         | ✓         | ✗                 | ✗     | ✓          |
| 0.450 | Nd5Ge4        | ✓         | ✗                 | ✗     | ✓          |
| 0.473 | La(MnSi)2     | ✗         | ✗                 | ✗     | ✗          |
| 0.478 | SmCrO3        | ✓         | ✓                 | ✗     | ✓          |
| 0.479 | SmCrO3        | ✓         | ✗                 | ✗     | ✓          |

Continued on next page



| index | material    | inversion | antiferromagnetic | total | sublattice |
|-------|-------------|-----------|-------------------|-------|------------|
| 0.480 | HoNi        | ✓         | ✗                 | ✗     | ✓          |
| 0.481 | HoNi        | ✓         | ✗                 | ✗     | ✓          |
| 0.487 | Er(CrSi)2   | ✗         | ✗                 | ✗     | ✗          |
| 0.488 | YbMnO3      | ✗         | ✓                 | ✓     | ✓          |
| 0.489 | YbMnO3      | ✗         | ✓                 | ✓     | ✓          |
| 0.490 | YbMnO3      | ✗         | ✗                 | ✓     | ✓          |
| 0.491 | NdB4        | ✗         | ✓                 | ✓     | ✓          |
| 0.492 | NdB4        | ✗         | ✓                 | ✓     | ✓          |
| 0.495 | La(MnSi)2   | ✗         | ✗                 | ✗     | ✗          |
| 0.496 | La(MnSi)2   | ✗         | ✗                 | ✗     | ✗          |
| 0.497 | La(MnSi)2   | ✗         | ✗                 | ✗     | ✗          |
| 0.506 | Cs2Cu3SnF12 | ✓         | ✓                 | ✗     | ✓          |
| 0.511 | Ta2Co4O9    | ✗         | ✓                 | ✓     | ✓          |
| 0.520 | TbCoO3      | ✗         | ✓                 | ✓     | ✓          |
| 0.521 | DyCoO3      | ✗         | ✓                 | ✓     | ✓          |
| 0.529 | Nb2Co4O9    | ✗         | ✓                 | ✓     | ✓          |
| 0.530 | SrCu(TeO3)2 | ✗         | ✓                 | ✓     | ✓          |
| 0.544 | Mn2FeReO6   | ✓         | ✗                 | ✗     | ✓          |
| 0.545 | Mn2FeReO6   | ✓         | ✗                 | ✗     | ✓          |
| 0.550 | Mn3ReO6     | ✓         | ✓                 | ✗     | ✓          |
| 0.551 | Mn3ReO6     | ✓         | ✓                 | ✗     | ✓          |
| 0.552 | Mn(PbO2)2   | ✗         | ✓                 | ✓     | ✓          |
| 0.564 | U2Si5Rh3    | ✓         | ✓                 | ✗     | ✓          |
| 0.565 | Ce2Ni3Ge5   | ✓         | ✓                 | ✗     | ✓          |
| 0.571 | CoSO4       | ✓         | ✓                 | ✗     | ✗          |
| 0.572 | Na2CrNiF7   | ✓         | ✗                 | ✗     | ✗          |
| 0.573 | Na2CrNiF7   | ✓         | ✗                 | ✗     | ✗          |
| 0.574 | MnFeH4O2F5  | ✗         | ✗                 | ✓     | ✓          |
| 0.576 | Cr2F5       | ✓         | ✗                 | ✗     | ✗          |
| 0.577 | BaMnFeF7    | ✓         | ✗                 | ✗     | ✓          |
| 0.578 | BaNaFe2F9   | ✓         | ✗                 | ✗     | ✓          |
| 0.579 | Na2FeNiF7   | ✓         | ✗                 | ✗     | ✗          |
| 0.580 | Na2FeNiF7   | ✓         | ✗                 | ✗     | ✗          |
| 0.583 | Fe2H4O2F5   | ✓         | ✗                 | ✗     | ✗          |
| 0.584 | Fe2H4O2F5   | ✓         | ✗                 | ✗     | ✗          |
| 0.588 | PrCrO3      | ✓         | ✗                 | ✗     | ✓          |
| 0.589 | NdCrO3      | ✓         | ✓                 | ✗     | ✓          |
| 0.590 | ErCrO3      | ✓         | ✓                 | ✗     | ✓          |
| 0.612 | Cu2SO5      | ✓         | ✗                 | ✗     | ✓          |
| 0.625 | U2InPd2     | ✗         | ✓                 | ✓     | ✓          |
| 0.641 | Mn3Ga       | ✓         | ✗                 | ✗     | ✗          |
| 0.652 | HoMnO3      | ✗         | ✓                 | ✓     | ✓          |
| 0.656 | Nd(MnGe)2   | ✗         | ✗                 | ✗     | ✗          |
| 0.657 | Pr(MnGe)2   | ✗         | ✗                 | ✗     | ✗          |
| 0.658 | BaCu(TeO3)2 | ✗         | ✓                 | ✓     | ✓          |
| 0.663 | Mn3Sn2      | ✓         | ✗                 | ✗     | ✓          |
| 0.664 | Mn3Sn2      | ✓         | ✗                 | ✗     | ✓          |
| 0.684 | TbPt        | ✓         | ✗                 | ✗     | ✓          |
| 0.685 | ErPt        | ✓         | ✗                 | ✗     | ✓          |
| 0.686 | HoPt        | ✓         | ✗                 | ✗     | ✓          |
| 0.687 | DyPt        | ✓         | ✗                 | ✗     | ✓          |
| 0.688 | TmPt        | ✓         | ✗                 | ✗     | ✓          |
| 0.697 | SmCrO3      | ✓         | ✗                 | ✗     | ✓          |
| 0.698 | SmCrO3      | ✓         | ✓                 | ✗     | ✓          |
| 0.707 | Tb2(Ga3Ir)3 | ✓         | ✗                 | ✗     | ✓          |
| 0.715 | HoCrWO6     | ✗         | ✓                 | ✓     | ✓          |
| 0.716 | HoCrWO6     | ✗         | ✓                 | ✓     | ✓          |
| 0.724 | BaCoSiO4    | ✗         | ✓                 | ✓     | ✓          |
| 0.727 | CsMn2F6     | ✓         | ✗                 | ✗     | ✓          |
| 0.740 | Dy3Ga5O12   | ✓         | ✓                 | ✗     | ✓          |

Continued on next page

| index  | material     | inversion | antiferromagnetic | total | sublattice |
|--------|--------------|-----------|-------------------|-------|------------|
| 0.741  | Er3Ga5O12    | ✓         | ✓                 | ✗     | ✓          |
| 0.743  | Ho3Al5O12    | ✓         | ✓                 | ✗     | ✓          |
| 0.744  | Tb3Al5O12    | ✓         | ✓                 | ✗     | ✓          |
| 0.745  | Ho3Ga5O12    | ✓         | ✓                 | ✗     | ✓          |
| 0.746  | Tb3Ga5O12    | ✓         | ✓                 | ✗     | ✓          |
| 0.756  | V4GaS8       | ✗         | ✗                 | ✓     | ✓          |
| 0.761  | SrFe2Se2O    | ✗         | ✓                 | ✓     | ✓          |
| 0.762  | SrFe2S2O     | ✗         | ✓                 | ✓     | ✓          |
| 0.763  | Mn5P4(HO2)10 | ✓         | ✗                 | ✗     | ✓          |
| 0.764  | Mn5P4(HO2)10 | ✓         | ✗                 | ✗     | ✓          |
| 0.765  | Mn5P4(HO2)10 | ✓         | ✗                 | ✗     | ✓          |
| 0.768  | SrMnSb2      | ✗         | ✗                 | ✓     | ✓          |
| 0.773  | NdMnSi2      | ✓         | ✗                 | ✗     | ✓          |
| 0.782  | NdScO3       | ✗         | ✓                 | ✓     | ✓          |
| 0.783  | NdInO3       | ✗         | ✓                 | ✓     | ✓          |
| 0.785  | NdVO3        | ✓         | ✓                 | ✗     | ✓          |
| 0.788  | YVO3         | ✓         | ✓                 | ✗     | ✗          |
| 0.803  | MnNbP        | ✗         | ✓                 | ✓     | ✓          |
| 0.809  | Fe2WO6       | ✗         | ✓                 | ✓     | ✓          |
| 0.810  | Fe2WO6       | ✓         | ✗                 | ✗     | ✓          |
| 0.812  | Fe2WO6       | ✗         | ✓                 | ✓     | ✓          |
| 0.818  | Ta2MnO6      | ✗         | ✓                 | ✓     | ✓          |
| 0.819  | MnNb2O6      | ✗         | ✓                 | ✓     | ✓          |
| 0.831  | BaCaFe4O7    | ✗         | ✗                 | ✓     | ✓          |
| 1.0.4  | CsNiCl3      | ✗         | ✓                 | ✓     | ✓          |
| 1.0.8  | Ba3MnNb2O9   | ✗         | ✓                 | ✗     | ✗          |
| 1.0.14 | CsFeCl3      | ✗         | ✓                 | ✗     | ✗          |
| 1.0.22 | K2Mn3V2CO11  | ✗         | ✓                 | ✗     | ✓          |
| 1.0.24 | ThMn2        | ✗         | ✓                 | ✗     | ✓          |
| 1.0.31 | Eu(InAs)2    | ✗         | ✓                 | ✓     | ✓          |
| 1.0.32 | Eu(InAs)2    | ✗         | ✓                 | ✓     | ✓          |
| 1.0.33 | FeF3         | ✓         | ✓                 | ✗     | ✗          |
| 1.0.35 | CsMnBr3      | ✗         | ✓                 | ✗     | ✗          |
| 1.0.40 | RbFeCl3      | ✗         | ✓                 | ✗     | ✗          |
| 1.0.41 | RbNiCl3      | ✗         | ✓                 | ✗     | ✗          |
| 1.0.42 | CsNiCl3      | ✗         | ✓                 | ✗     | ✗          |
| 1.0.44 | Ba3CoSb2O9   | ✗         | ✓                 | ✗     | ✗          |
| 1.0.45 | Ba3CoSb2O9   | ✗         | ✓                 | ✗     | ✗          |
| 1.0.46 | Ba3MnSb2O9   | ✗         | ✓                 | ✓     | ✓          |
| 1.0.49 | BaCoSiO4     | ✗         | ✓                 | ✓     | ✓          |
| 1.0.50 | CoGeO3       | ✓         | ✗                 | ✗     | ✓          |
| 1.0.52 | Tb7Ag27      | ✗         | ✓                 | ✓     | ✓          |
| 1.2    | CuSe2O5      | ✓         | ✓                 | ✗     | ✗          |
| 1.13   | Ba3Nb2NiO9   | ✗         | ✓                 | ✗     | ✗          |
| 1.14   | BaHo2NiO5    | ✓         | ✓                 | ✗     | ✓          |
| 1.15   | BaHo2NiO5    | ✓         | ✓                 | ✗     | ✓          |
| 1.19   | PrMn2O5      | ✗         | ✓                 | ✓     | ✓          |
| 1.25   | KFe3(SO7)2   | ✓         | ✓                 | ✗     | ✗          |
| 1.34   | HoGeAu       | ✗         | ✓                 | ✗     | ✓          |
| 1.36   | BaDy2NiO5    | ✓         | ✓                 | ✗     | ✓          |
| 1.38   | NaNd2OsO6    | ✓         | ✓                 | ✗     | ✓          |
| 1.39   | LiFe(GeO3)2  | ✓         | ✓                 | ✗     | ✓          |
| 1.44   | NdNiO3       | ✗         | ✓                 | ✗     | ✓          |
| 1.48   | HoNiO3       | ✗         | ✓                 | ✓     | ✓          |
| 1.51   | Cs2CoCl4     | ✗         | ✓                 | ✓     | ✓          |
| 1.53   | BaEr2NiO5    | ✓         | ✓                 | ✗     | ✓          |
| 1.54   | GdMn2O5      | ✗         | ✓                 | ✓     | ✓          |
| 1.67   | TmInPt       | ✗         | ✓                 | ✓     | ✓          |
| 1.68   | NaNdFeWO6    | ✗         | ✓                 | ✓     | ✓          |
| 1.73   | CaV2O4       | ✓         | ✓                 | ✗     | ✓          |

Continued on next page

| index | material                                                         | inversion | antiferromagnetic | total | sublattice |
|-------|------------------------------------------------------------------|-----------|-------------------|-------|------------|
| 1.74  | Mn <sub>2</sub> BiO <sub>5</sub>                                 | ✗         | ✓                 | ✓     | ✓          |
| 1.75  | Mn <sub>2</sub> BiO <sub>5</sub>                                 | ✗         | ✓                 | ✓     | ✓          |
| 1.76  | DyMn <sub>2</sub> O <sub>5</sub>                                 | ✗         | ✓                 | ✓     | ✓          |
| 1.77  | Sr <sub>2</sub> IrO <sub>4</sub>                                 | ✓         | ✓                 | ✗     | ✓          |
| 1.83  | Ba <sub>2</sub> Fe <sub>2</sub> O <sub>5</sub>                   | ✓         | ✓                 | ✗     | ✓          |
| 1.85  | Mn                                                               | ✗         | ✓                 | ✓     | ✓          |
| 1.88  | Mn <sub>5</sub> Si <sub>3</sub>                                  | ✓         | ✓                 | ✗     | ✓          |
| 1.89  | DyFe <sub>3</sub> (BO <sub>3</sub> ) <sub>4</sub>                | ✗         | ✓                 | ✓     | ✓          |
| 1.92  | HoFe <sub>3</sub> (BO <sub>3</sub> ) <sub>4</sub>                | ✗         | ✓                 | ✓     | ✓          |
| 1.93  | HoFe <sub>3</sub> (BO <sub>3</sub> ) <sub>4</sub>                | ✗         | ✓                 | ✗     | ✓          |
| 1.95  | BaNd <sub>2</sub> O <sub>4</sub>                                 | ✓         | ✓                 | ✗     | ✓          |
| 1.96  | BaNd <sub>2</sub> O <sub>4</sub>                                 | ✓         | ✓                 | ✗     | ✓          |
| 1.98  | Dy(Fe <sub>2</sub> Ge) <sub>2</sub>                              | ✗         | ✓                 | ✓     | ✓          |
| 1.99  | CsCoH <sub>4</sub> Cl <sub>3</sub> O <sub>2</sub>                | ✓         | ✓                 | ✗     | ✓          |
| 1.102 | U <sub>2</sub> InNi <sub>2</sub>                                 | ✓         | ✓                 | ✗     | ✓          |
| 1.108 | TbMn <sub>2</sub> O <sub>5</sub>                                 | ✗         | ✓                 | ✓     | ✓          |
| 1.109 | HoMn <sub>2</sub> O <sub>5</sub>                                 | ✗         | ✓                 | ✓     | ✓          |
| 1.114 | Ca <sub>4</sub> IrO <sub>6</sub>                                 | ✓         | ✓                 | ✗     | ✗          |
| 1.115 | Dy <sub>3</sub> (Al <sub>3</sub> Ru) <sub>4</sub>                | ✓         | ✓                 | ✗     | ✓          |
| 1.116 | MnVAgO <sub>4</sub>                                              | ✓         | ✓                 | ✗     | ✗          |
| 1.117 | NaFePO <sub>4</sub>                                              | ✓         | ✓                 | ✗     | ✗          |
| 1.118 | GdPO <sub>4</sub>                                                | ✓         | ✓                 | ✗     | ✓          |
| 1.122 | Cu <sub>3</sub> BiSe <sub>2</sub> BrO <sub>8</sub>               | ✓         | ✓                 | ✗     | ✓          |
| 1.123 | YCu <sub>3</sub> Se <sub>2</sub> ClO <sub>8</sub>                | ✓         | ✓                 | ✗     | ✓          |
| 1.124 | BaYFe <sub>4</sub> O <sub>7</sub>                                | ✗         | ✓                 | ✓     | ✓          |
| 1.126 | NaCoSO <sub>4</sub> F                                            | ✓         | ✓                 | ✗     | ✗          |
| 1.127 | NiBiPO <sub>5</sub>                                              | ✓         | ✓                 | ✗     | ✓          |
| 1.128 | CoBiPO <sub>5</sub>                                              | ✓         | ✓                 | ✗     | ✓          |
| 1.129 | Fe <sub>3</sub> AgH <sub>6</sub> (SO <sub>7</sub> ) <sub>2</sub> | ✓         | ✓                 | ✗     | ✗          |
| 1.133 | Cu(SbO <sub>3</sub> ) <sub>2</sub>                               | ✓         | ✓                 | ✗     | ✗          |
| 1.135 | Co <sub>2</sub> H <sub>4</sub> C <sub>8</sub> O <sub>11</sub>    | ✓         | ✓                 | ✗     | ✓          |
| 1.138 | MgV <sub>2</sub> O <sub>4</sub>                                  | ✗         | ✓                 | ✓     | ✓          |
| 1.147 | Li <sub>2</sub> Fe(SO <sub>4</sub> ) <sub>2</sub>                | ✓         | ✓                 | ✗     | ✗          |
| 1.161 | PrFe <sub>3</sub> (BO <sub>3</sub> ) <sub>4</sub>                | ✗         | ✓                 | ✓     | ✓          |
| 1.167 | NiS <sub>2</sub>                                                 | ✓         | ✓                 | ✗     | ✗          |
| 1.170 | Tm <sub>5</sub> (In <sub>2</sub> Ni) <sub>2</sub>                | ✗         | ✓                 | ✓     | ✓          |
| 1.185 | Cu <sub>2</sub> GeO <sub>4</sub>                                 | ✗         | ✓                 | ✗     | ✓          |
| 1.196 | MnV <sub>2</sub> O <sub>6</sub>                                  | ✓         | ✓                 | ✗     | ✓          |
| 1.197 | Fe <sub>4</sub> Si <sub>2</sub> Sn <sub>7</sub> O <sub>16</sub>  | ✓         | ✓                 | ✗     | ✗          |
| 1.201 | Cr <sub>2</sub> ReO <sub>8</sub>                                 | ✓         | ✓                 | ✗     | ✓          |
| 1.202 | CrReO <sub>4</sub>                                               | ✓         | ✓                 | ✗     | ✓          |
| 1.203 | Si(NiO <sub>2</sub> ) <sub>2</sub>                               | ✓         | ✓                 | ✗     | ✓          |
| 1.204 | Si(NiO <sub>2</sub> ) <sub>2</sub>                               | ✓         | ✓                 | ✗     | ✓          |
| 1.207 | U <sub>2</sub> SnRh <sub>2</sub>                                 | ✓         | ✓                 | ✗     | ✓          |
| 1.216 | BaNd <sub>2</sub> NiO <sub>5</sub>                               | ✓         | ✓                 | ✗     | ✓          |
| 1.217 | BaTb <sub>2</sub> NiO <sub>5</sub>                               | ✓         | ✓                 | ✗     | ✓          |
| 1.218 | BaTm <sub>2</sub> NiO <sub>5</sub>                               | ✓         | ✓                 | ✗     | ✓          |
| 1.224 | Nb <sub>2</sub> CoO <sub>6</sub>                                 | ✗         | ✓                 | ✓     | ✓          |
| 1.226 | CeCo <sub>2</sub> (GeO <sub>3</sub> ) <sub>4</sub>               | ✓         | ✓                 | ✗     | ✗          |
| 1.227 | Ca <sub>2</sub> Cr <sub>2</sub> O <sub>5</sub>                   | ✗         | ✓                 | ✓     | ✓          |
| 1.235 | BaTiCu <sub>4</sub> P <sub>4</sub> O <sub>17</sub>               | ✗         | ✓                 | ✓     | ✓          |
| 1.237 | VCl <sub>2</sub>                                                 | ✗         | ✓                 | ✗     | ✗          |
| 1.238 | VBr <sub>2</sub>                                                 | ✗         | ✓                 | ✗     | ✗          |
| 1.266 | SmFe <sub>3</sub> (BO <sub>3</sub> ) <sub>4</sub>                | ✗         | ✓                 | ✗     | ✓          |
| 1.267 | Dy <sub>2</sub> (Al <sub>3</sub> Co) <sub>3</sub>                | ✗         | ✓                 | ✓     | ✓          |
| 1.272 | CeNiAsO                                                          | ✗         | ✓                 | ✓     | ✓          |
| 1.274 | DyFeWO <sub>6</sub>                                              | ✗         | ✓                 | ✓     | ✓          |
| 1.279 | Ho <sub>2</sub> Cu <sub>2</sub> O <sub>5</sub>                   | ✗         | ✓                 | ✓     | ✓          |
| 1.280 | Yb <sub>2</sub> Cu <sub>2</sub> O <sub>5</sub>                   | ✗         | ✓                 | ✓     | ✓          |
| 1.299 | GdMn <sub>2</sub>                                                | ✗         | ✓                 | ✓     | ✓          |

Continued on next page

| index | material      | inversion | antiferromagnetic | total | sublattice |
|-------|---------------|-----------|-------------------|-------|------------|
| 1.300 | GdMn2         | ✗         | ✓                 | ✓     | ✓          |
| 1.301 | MnBiTeO6      | ✓         | ✓                 | ✗     | ✓          |
| 1.302 | Ba2CoO4       | ✓         | ✓                 | ✗     | ✓          |
| 1.303 | Dy3(Al3Ru)4   | ✓         | ✓                 | ✗     | ✓          |
| 1.306 | BaNa2MnV2O8   | ✓         | ✓                 | ✗     | ✗          |
| 1.307 | Mn5Si3        | ✗         | ✓                 | ✓     | ✓          |
| 1.323 | CoGeO3        | ✓         | ✓                 | ✗     | ✓          |
| 1.324 | DyMn2O5       | ✗         | ✓                 | ✓     | ✓          |
| 1.326 | PrMn2O5       | ✓         | ✓                 | ✗     | ✓          |
| 1.327 | LaMn2O5       | ✓         | ✓                 | ✗     | ✓          |
| 1.328 | Yb2MnCoO6     | ✗         | ✓                 | ✓     | ✓          |
| 1.330 | Lu2MnCoO6     | ✗         | ✓                 | ✓     | ✓          |
| 1.338 | U2InNi2       | ✓         | ✓                 | ✗     | ✓          |
| 1.340 | LuMnO3        | ✗         | ✓                 | ✗     | ✓          |
| 1.342 | Co3(PO4)2     | ✓         | ✓                 | ✗     | ✓          |
| 1.343 | Ba2Co9O14     | ✓         | ✓                 | ✗     | ✓          |
| 1.345 | NaMnF4        | ✓         | ✓                 | ✗     | ✗          |
| 1.350 | BaNd2CoO5     | ✓         | ✓                 | ✗     | ✓          |
| 1.352 | Ba2Ni2ClF7    | ✓         | ✓                 | ✗     | ✓          |
| 1.357 | Ho3Ge4        | ✓         | ✓                 | ✗     | ✓          |
| 1.359 | Dy3Ge4        | ✓         | ✓                 | ✗     | ✓          |
| 1.362 | Er3Ge4        | ✓         | ✓                 | ✗     | ✓          |
| 1.380 | Sr2FeClO3     | ✗         | ✓                 | ✗     | ✓          |
| 1.381 | Sr2FeBrO3     | ✗         | ✓                 | ✗     | ✓          |
| 1.382 | Ca2FeClO3     | ✗         | ✓                 | ✗     | ✓          |
| 1.383 | Ca2FeBrO3     | ✗         | ✓                 | ✗     | ✓          |
| 1.385 | Sr2FeO3F      | ✗         | ✓                 | ✗     | ✓          |
| 1.386 | Sr2FeO3F      | ✗         | ✓                 | ✗     | ✓          |
| 1.387 | Sr2FeO3F      | ✗         | ✓                 | ✗     | ✓          |
| 1.418 | Cu4O3         | ✗         | ✓                 | ✗     | ✓          |
| 1.431 | Ca2Mn3O8      | ✓         | ✓                 | ✗     | ✓          |
| 1.441 | NaFe3H6(SO7)2 | ✓         | ✓                 | ✗     | ✗          |
| 1.443 | BaGd2CuO5     | ✗         | ✓                 | ✓     | ✓          |
| 1.444 | Er2Pt         | ✗         | ✓                 | ✓     | ✓          |
| 1.455 | Mn6Si7Ni16    | ✓         | ✓                 | ✗     | ✓          |
| 1.456 | Sr2Cu3(SeO)2  | ✗         | ✓                 | ✗     | ✗          |
| 1.476 | Ba2CoO4       | ✓         | ✓                 | ✗     | ✓          |
| 1.477 | Ba2CoO4       | ✓         | ✓                 | ✗     | ✓          |
| 1.484 | Li2MnGeO4     | ✗         | ✓                 | ✓     | ✓          |
| 1.498 | CuSi(HO2)2    | ✓         | ✓                 | ✗     | ✓          |
| 1.499 | CsFe(MoO4)2   | ✗         | ✓                 | ✓     | ✓          |
| 1.519 | CoSO4         | ✓         | ✓                 | ✗     | ✗          |
| 1.524 | MnInO3        | ✗         | ✓                 | ✗     | ✓          |
| 1.525 | MnInO3        | ✗         | ✓                 | ✗     | ✓          |
| 1.528 | Fe4Bi2O9      | ✓         | ✓                 | ✗     | ✓          |
| 1.533 | TbC2          | ✗         | ✓                 | ✓     | ✓          |
| 1.549 | U2InNi2       | ✓         | ✓                 | ✗     | ✓          |
| 1.577 | SrNd2O4       | ✓         | ✓                 | ✗     | ✓          |
| 1.584 | PrFeAsO       | ✓         | ✓                 | ✗     | ✓          |
| 1.587 | NdFeAsO       | ✓         | ✓                 | ✗     | ✓          |
| 1.595 | CaCoSO        | ✗         | ✓                 | ✓     | ✓          |
| 1.599 | DyMn2O5       | ✗         | ✓                 | ✓     | ✓          |
| 1.622 | CoGeO3        | ✓         | ✓                 | ✗     | ✓          |
| 1.649 | Sr3ZnIrO6     | ✓         | ✓                 | ✗     | ✗          |
| 1.651 | BaHo2CuO5     | ✓         | ✓                 | ✗     | ✓          |
| 1.657 | LuNiO3        | ✗         | ✓                 | ✓     | ✓          |
| 1.660 | FeSb6(Pb2S7)2 | ✓         | ✓                 | ✗     | ✗          |
| 1.661 | La2NiIrO6     | ✓         | ✓                 | ✗     | ✗          |
| 1.662 | La2NiIrO6     | ✓         | ✓                 | ✗     | ✗          |
| 2.2   | Sr2Fe2S2OF2   | ✓         | ✓                 | ✗     | ✓          |

Continued on next page

| index | material       | inversion | antiferromagnetic | total | sublattice |
|-------|----------------|-----------|-------------------|-------|------------|
| 2.3   | HoNiO3         | X         | ✓                 | ✓     | ✓          |
| 2.5   | Mn3CuN         | ✓         | X                 | X     | ✓          |
| 2.6   | Nd2CuO4        | ✓         | ✓                 | X     | X          |
| 2.7   | Sm2CuO4        | ✓         | ✓                 | X     | X          |
| 2.8   | SrHo2O4        | X         | ✓                 | ✓     | ✓          |
| 2.9   | Ca3CuNi2(PO4)4 | ✓         | ✓                 | X     | ✓          |
| 2.10  | HoP            | ✓         | X                 | X     | X          |
| 2.11  | TbMg           | ✓         | X                 | X     | X          |
| 2.12  | TbMg           | ✓         | X                 | X     | X          |
| 2.13  | UP             | ✓         | ✓                 | X     | X          |
| 2.14  | NdMg           | ✓         | ✓                 | X     | X          |
| 2.18  | Sc2MnNiO6      | ✓         | ✓                 | X     | ✓          |
| 2.19  | Mn3ZnC         | ✓         | X                 | X     | X          |
| 2.20  | UAs            | ✓         | ✓                 | X     | ✓          |
| 2.21  | TbHO2          | X         | ✓                 | ✓     | ✓          |
| 2.22  | Ta2FeO6        | ✓         | ✓                 | X     | X          |
| 2.23  | Sr2CoAg2(SeO)2 | ✓         | ✓                 | X     | X          |
| 2.24  | Ba2CoAg2(SeO)2 | ✓         | ✓                 | X     | X          |
| 2.27  | Sr2Mn3(SbO)2   | X         | ✓                 | X     | ✓          |
| 2.28  | NpGa5Ni        | ✓         | X                 | X     | X          |
| 2.29  | Mn3O4          | ✓         | X                 | X     | ✓          |
| 2.31  | Mn3ZnN         | ✓         | ✓                 | X     | ✓          |
| 2.33  | Na2Mn3Se4      | ✓         | ✓                 | X     | ✓          |
| 2.35  | CrSe           | X         | ✓                 | X     | X          |
| 2.48  | Pr2CuO4        | ✓         | ✓                 | X     | X          |
| 2.49  | La2Fe2Se2O3    | ✓         | ✓                 | X     | ✓          |
| 2.51  | EuMnBi2        | X         | X                 | X     | ✓          |
| 2.52  | Mn3O4          | X         | X                 | ✓     | ✓          |
| 2.53  | Ba2Mn3(SbO)2   | X         | ✓                 | X     | ✓          |
| 2.54  | Sr2Cr3(AsO)2   | ✓         | ✓                 | X     | ✓          |
| 2.55  | Sr2Fe3Se2O3    | X         | ✓                 | ✓     | ✓          |
| 2.56  | La2Fe2S2O3     | ✓         | ✓                 | X     | ✓          |
| 2.57  | Tb(MnSi)2      | ✓         | X                 | X     | ✓          |
| 2.60  | Nd(MnSi)2      | ✓         | X                 | X     | ✓          |
| 2.61  | Fe3H4(OF4)2    | ✓         | ✓                 | X     | X          |
| 2.62  | TbCrO3         | X         | ✓                 | ✓     | ✓          |
| 2.63  | DyCrO3         | ✓         | ✓                 | X     | ✓          |
| 2.64  | DyCrO3         | ✓         | ✓                 | X     | ✓          |
| 2.66  | FeSn2          | X         | ✓                 | X     | X          |
| 2.67  | FeSn2          | ✓         | ✓                 | X     | X          |
| 2.68  | FeGe2          | X         | ✓                 | X     | X          |
| 2.70  | GdMg           | ✓         | X                 | X     | X          |
| 2.71  | HoRh           | ✓         | ✓                 | X     | X          |
| 2.72  | Nb3VS6         | X         | X                 | X     | ✓          |
| 2.73  | BaNd2ZnO5      | ✓         | ✓                 | X     | ✓          |
| 2.75  | Sr2Fe3S2O3     | ✓         | ✓                 | X     | ✓          |
| 2.76  | Sr2Fe3Se2O3    | X         | ✓                 | ✓     | ✓          |
| 2.77  | Eu2CuO4        | ✓         | ✓                 | X     | X          |
| 2.78  | Nd2CuO4        | ✓         | ✓                 | X     | X          |
| 2.79  | Pr2CuO4        | ✓         | ✓                 | X     | X          |
| 2.81  | Er(MnSi)2      | ✓         | X                 | X     | ✓          |
| 2.82  | Er(MnSi)2      | ✓         | X                 | X     | ✓          |
| 2.83  | Er(MnGe)2      | ✓         | X                 | X     | ✓          |
| 2.84  | Er(MnGe)2      | ✓         | X                 | X     | ✓          |
| 2.85  | BaHo2CuO5      | X         | ✓                 | ✓     | ✓          |
| 2.86  | Ta2FeO6        | ✓         | ✓                 | X     | X          |
| 3.1   | TmAgGe         | X         | ✓                 | ✓     | ✓          |
| 3.2   | UO2            | ✓         | ✓                 | X     | X          |
| 3.4   | MgCr2O4        | X         | ✓                 | X     | ✓          |
| 3.6   | DyCu           | ✓         | ✓                 | X     | X          |

Continued on next page

| index | material | inversion | antiferromagnetic | total sublattice |
|-------|----------|-----------|-------------------|------------------|
| 3.7   | NpBi     | ✓         | ✓                 | ✗ ✗              |
| 3.8   | NdZn     | ✓         | ✓                 | ✗ ✗              |
| 3.9   | NpS      | ✓         | ✓                 | ✗ ✗              |
| 3.10  | NpSe     | ✓         | ✓                 | ✗ ✗              |
| 3.11  | NpTe     | ✓         | ✓                 | ✗ ✗              |
| 3.12  | NpSb     | ✓         | ✓                 | ✗ ✗              |
| 3.13  | CeB6     | ✓         | ✓                 | ✗ ✓              |
| 3.18  | HoRh     | ✓         | ✓                 | ✗ ✗              |
| 3.19  | CoO      | ✓         | ✓                 | ✗ ✗              |

- 
- [1] J. Zelezný, “[symcode](#),” (2017).
- [2] J. Železný, H. Gao, A. Manchon, F. Freimuth, Y. Mokrousov, J. Zemen, J. Mašek, J. Sinova, and T. Jungwirth, [Physical Review B](#) **95**, 014403 (2017).
- [3] W. F. Brinkman and R. J. Elliott, [Proceedings of the Royal Society of London Series A](#) **294**, 343 (1966).
- [4] D. B. Litvin and W. Opechowski, [Physica](#) **76**, 538 (1974).
- [5] S. V. Gallego, J. M. Perez-Mato, L. Elcoro, E. S. Tasci, R. M. Hanson, K. Momma, M. I. Aroyo, and G. Madariaga, [J. Appl. Crystallogr.](#) **49**, 1750 (2016).
- [6] S. V. Gallego, J. M. Perez-Mato, L. Elcoro, E. S. Tasci, R. M. Hanson, M. I. Aroyo, and G. Madariaga, [J. Appl. Crystallogr.](#) **49**, 1941 (2016).
